# Supplementary material for: Technical evaluation and usability of a quantitative G6PD POC test in cord blood: a mixed-methods study in a low-resource setting
Source: PubMed Central journal article supplement (PMC9748916; doi:10.1136/bmjopen-2022-066529), 2022-12-13

# BMJ Open

BMJ Open is committed to open peer review. As part of this commitment we make the peer review history of every article we publish publicly available.

When an article is published we post the peer reviewers' comments and the authors' responses online. We also post the versions of the paper that were used during peer review. These are the versions that the peer review comments apply to.

The versions of the paper that follow are the versions that were submitted during the peer review process. They are not the versions of record or the final published versions. They should not be cited or distributed as the published version of this manuscript.

BMJ Open is an open access journal and the full, final, typeset and author-corrected version of record of the manuscript is available on our site with no access controls, subscription charges or pay-per-view fees (<http://bmjopen.bmj.com>).

If you have any questions on BMJ Open's open peer review process please email [info.bmjopen@bmj.com](mailto:info.bmjopen@bmj.com)

# BMJ Open

## Quantitative G6PD point-of-care test can be used reliably on cord blood to identify male and female newborns at increased risk of neonatal hyperbilirubinaemia: a mixed method study

|                               |                                                                                                                                                                                                                                                                                                                                                                                                                                                                                                                                                                                                                                                                                                                                                                                                                                                                                                                                                                                                                                                                                                                                                                                                                                                                                                                                                                                                                                                                     |
|-------------------------------|---------------------------------------------------------------------------------------------------------------------------------------------------------------------------------------------------------------------------------------------------------------------------------------------------------------------------------------------------------------------------------------------------------------------------------------------------------------------------------------------------------------------------------------------------------------------------------------------------------------------------------------------------------------------------------------------------------------------------------------------------------------------------------------------------------------------------------------------------------------------------------------------------------------------------------------------------------------------------------------------------------------------------------------------------------------------------------------------------------------------------------------------------------------------------------------------------------------------------------------------------------------------------------------------------------------------------------------------------------------------------------------------------------------------------------------------------------------------|
| Journal:                      | <i>BMJ Open</i>                                                                                                                                                                                                                                                                                                                                                                                                                                                                                                                                                                                                                                                                                                                                                                                                                                                                                                                                                                                                                                                                                                                                                                                                                                                                                                                                                                                                                                                     |
| Manuscript ID                 | bmjopen-2022-066529                                                                                                                                                                                                                                                                                                                                                                                                                                                                                                                                                                                                                                                                                                                                                                                                                                                                                                                                                                                                                                                                                                                                                                                                                                                                                                                                                                                                                                                 |
| Article Type:                 | Original research                                                                                                                                                                                                                                                                                                                                                                                                                                                                                                                                                                                                                                                                                                                                                                                                                                                                                                                                                                                                                                                                                                                                                                                                                                                                                                                                                                                                                                                   |
| Date Submitted by the Author: | 12-Jul-2022                                                                                                                                                                                                                                                                                                                                                                                                                                                                                                                                                                                                                                                                                                                                                                                                                                                                                                                                                                                                                                                                                                                                                                                                                                                                                                                                                                                                                                                         |
| Complete List of Authors:     | <p>Bancone, Germana; Shoklo Malaria Research Unit; University of Oxford Centre for Tropical Medicine and Global Health<br/> Gilder, Mary Ellen; Department of Family Medicine, Faculty of Medicine, Chiang Mai University<br/> Win, Elsie; Shoklo Malaria Research Unit<br/> Gornsawun, Gornpan; Shoklo Malaria Research Unit<br/> Penpitchaporn, Penporn; Shoklo Malaria Research Unit<br/> Moo, Phaw Khu; Shoklo Malaria Research Unit<br/> Archasuksan, Laypaw; Shoklo Malaria Research Unit<br/> Wai, Nan San; Shoklo Malaria Research Unit<br/> Win, Sylverine; Shoklo Malaria Research Unit<br/> Aung, Ko Ko; Shoklo Malaria Research Unit<br/> Hashmi, Ahmar; Institute for Implementation Science, University of Texas Health Sciences Center (UTHealth), Houston, TX USA; Department of Health Promotion and Behavioral Sciences, School of Public Health, University of Texas Health Sciences Center (UTHealth)<br/> Hanboonkunupakarn, Borimas; Mahidol-Oxford Tropical Medicine Research Unit (MORU), Faculty of Tropical Medicine, Mahidol University<br/> Nosten, Francois; Shoklo Malaria Research Unit; University of Oxford Centre for Tropical Medicine and Global Health<br/> Carrara, Verena Ilona; Shoklo Malaria Research Unit; Institute of Global Health, Faculty of Medicine, University of Geneva, Switzerland<br/> McGready, Rose; Shoklo Malaria Research Unit; University of Oxford Centre for Tropical Medicine and Global Health</p> |
| Keywords:                     | PAEDIATRICS, NEONATOLOGY, MOLECULAR BIOLOGY                                                                                                                                                                                                                                                                                                                                                                                                                                                                                                                                                                                                                                                                                                                                                                                                                                                                                                                                                                                                                                                                                                                                                                                                                                                                                                                                                                                                                         |
|                               |                                                                                                                                                                                                                                                                                                                                                                                                                                                                                                                                                                                                                                                                                                                                                                                                                                                                                                                                                                                                                                                                                                                                                                                                                                                                                                                                                                                                                                                                     |

SCHOLARONE™  
Manuscripts

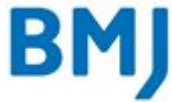

I, the Submitting Author has the right to grant and does grant on behalf of all authors of the Work (as defined in the below author licence), an exclusive licence and/or a non-exclusive licence for contributions from authors who are: i) UK Crown employees; ii) where BMJ has agreed a CC-BY licence shall apply, and/or iii) in accordance with the terms applicable for US Federal Government officers or employees acting as part of their official duties; on a worldwide, perpetual, irrevocable, royalty-free basis to BMJ Publishing Group Ltd ("BMJ") its licensees and where the relevant Journal is co-owned by BMJ to the co-owners of the Journal, to publish the Work in this journal and any other BMJ products and to exploit all rights, as set out in our [licence](#).

The Submitting Author accepts and understands that any supply made under these terms is made by BMJ to the Submitting Author unless you are acting as an employee on behalf of your employer or a postgraduate student of an affiliated institution which is paying any applicable article publishing charge ("APC") for Open Access articles. Where the Submitting Author wishes to make the Work available on an Open Access basis (and intends to pay the relevant APC), the terms of reuse of such Open Access shall be governed by a Creative Commons licence – details of these licences and which [Creative Commons](#) licence will apply to this Work are set out in our licence referred to above.

Other than as permitted in any relevant BMJ Author's Self Archiving Policies, I confirm this Work has not been accepted for publication elsewhere, is not being considered for publication elsewhere and does not duplicate material already published. I confirm all authors consent to publication of this Work and authorise the granting of this licence.

1  
2  
3  
4  
5 1 TITLE6 2 **Quantitative G6PD point-of-care test can be used reliably on cord blood to identify male and**  
7 3 **female newborns at increased risk of neonatal hyperbilirubinaemia: a mixed method study**  
8  
9 410 5 Germana Bancone<sup>1,2,\*</sup>, Mary Ellen Gilder<sup>3</sup>, Elsie Win<sup>1</sup>, Gornpan Gornsawun<sup>1</sup>, Penporn Penpitchaporn<sup>1</sup>,  
11 6 Paw Khu Moo<sup>1</sup>, Laypaw Archasuksan<sup>1</sup>, Nan San Wai<sup>1</sup>, Sylverine Win<sup>1</sup>, Ko Ko Aung<sup>1</sup>, Ahmar Hashmi<sup>5,6</sup>,  
12 7 Borimas Hanboonkunupakarn<sup>4</sup>, Francois Nosten<sup>1,2</sup>, Verena I Carrara<sup>1,2,7</sup>, Rose McGready<sup>1,2</sup>  
13 814 9  
15 10 1. Shoklo Malaria Research Unit, Mahidol-Oxford Tropical Medicine Research Unit, Faculty of Tropical  
16 11 Medicine, Mahidol University, Mae Sot, Thailand.17 12 2. Centre for Tropical Medicine and Global Health, Nuffield Department of Medicine, University of  
18 13 Oxford, Oxford, United Kingdom.19 14 3. Department of Family Medicine, Faculty of Medicine, Chiang Mai University, Chiang Mai 50200,  
20 15 Thailand.21 16 4. Mahidol-Oxford Tropical Medicine Research Unit (MORU), Faculty of Tropical Medicine, Mahidol  
22 17 University, Bangkok, Thailand.23 18 5. Institute for Implementation Science, University of Texas Health Sciences Center (UTHealth),  
24 19 Houston, TX USA25 20 6. Department of Health Promotion and Behavioral Sciences, School of Public Health, University of  
26 21 Texas Health Sciences Center (UTHealth) Houston, TX USA

27 22 7. Institute of Global Health, Faculty of Medicine, University of Geneva, Switzerland

28 23 \* corresponding author: [germana@tropmedres.ac](mailto:germana@tropmedres.ac)  
29 24  
30 25  
31 26  
32 27  
33 28  
34 29  
35 30  
36 31  
37 32  
38 33  
39 34  
40 35  
41 36  
42 37  
43 38  
44 39  
45 40  
46 41  
47 42  
48 43  
49 44  
50 45  
51 46  
52 47  
53 48  
54 49  
55 50  
56 51  
57 52  
58 53  
59 54  
60 55

## 28 ABSTRACT

29 Objectives: New point-of-care (POC) quantitative G6PD testing devices developed to provide safe  
30 radical cure for *P. vivax* malaria may be used to diagnose G6PD deficiency in newborns at risk of severe  
31 neonatal hyperbilirubinaemia, improving clinical care, and preventing related morbidity and mortality.

32 Methods: We conducted a mixed-methods study analyzing technical performance and usability of the  
33 "STANDARD G6PD" Biosensor when used by trained midwives on cord blood samples at two rural  
34 clinics on the Thailand-Myanmar border.

35 Results: In 307 cord blood samples, the Biosensor had a sensitivity of 1.000 (95%CI 0.859-1.000) and a  
36 specificity of 0.993 (95% CI 0.971-0.999) as compared to gold standard spectrophotometry to diagnose  
37 G6PD deficient newborns using a receiving operator characteristic (ROC) analysis-derived threshold of  
38  $\leq 4.8$  IU/gHb. The Biosensor had a sensitivity of 0.727 (95%CI: 0.498-0.893) and specificity of 0.933  
39 (95%CI: 0.876-0.969) for 30-70% activity range in females using ROC analysis-derived range of 4.9 to  
40 9.9 IU/gHb. These thresholds allowed identification of all G6PD deficient neonates and 80% of female  
41 neonates with intermediate phenotypes.

42 Need of phototherapy treatment for neonatal hyperbilirubinaemia was higher in neonates with  
43 deficient and intermediate phenotypes as diagnosed by either reference spectrophotometry or  
44 Biosensor.

45 Focus group discussions found high levels of learnability, willingness, satisfaction, and suitability for  
46 the Biosensor in this setting. The staff valued the capacity of the Biosensor to identify newborns with  
47 G6PD deficiency early ("We can know that early, we can counsel the parents about the chances of their  
48 children getting jaundice") and at the POC, including in more rural settings ("Because we can know the  
49 right result of the G6PD deficiency in a short time. Especially for the clinic which does not have a lab").

50 Conclusions: The Biosensor is a suitable tool in this resource-constrained setting to identify newborns  
51 with abnormal G6PD phenotypes at increased risk of neonatal hyperbilirubinaemia.

52

## 53 Strengths and limitations of this study

- 54 • The technical performance of the G6PD quantitative point-of-care diagnostic device was  
55 assessed against the current gold-standard spectrophotometric assay.
- 56 • Receiving operator characteristic analysis was used to identify the best diagnostic thresholds.
- 57 • Usability among clinical personnel from a resource-constrained setting was analysed using a  
58 conceptual framework developed for similar settings.
- 59 • Fewer than planned focus group discussions were conducted and they occurred in a single  
60 clinical site providing a possibly narrower point of view on the usability topics explored.

## 61 INTRODUCTION

62 Pathologically increased levels of bilirubin during the first week of life, i.e. neonatal  
63 hyperbilirubinaemia (NH), are common and dangerous for the developing brain. The most severe form  
64 of NH, kernicterus, causes neurological sequelae in >80% of neonates (56/100,000 live births globally,  
65 [1]). Every year, an estimated twenty-four million newborns are at risk of NH-related adverse outcomes  
66 with three-quarters of mortality occurring in sub-Saharan Africa and South Asia [1,2]. These  
67 preventable deaths and disabilities disproportionately affect neonates where universal health care and  
68 treatment options are scarce, if not absent [3].

69 Several genetic and clinical factors influence the timing and evolution of NH, including G6PD deficiency,  
70 ABO blood group incompatibility, prematurity/low birth weight and sepsis [4]. Early identification of  
71 these risk factors can dramatically improve neonatal clinical management during the first days of life  
72 [5].

73 The enzymatic defect of G6PD deficiency, caused by mutations on the X-linked G6PD gene, is a known  
74 risk factor for increased levels of bilirubin after birth and it is associated with susceptibility to drug-  
75 induced haemolysis [6]. Risk of severe NH is increased in both deficient and heterozygous newborns  
76 with abnormal phenotypes [7-9] and universal neonatal screening of G6PD deficiency is supported by  
77 WHO in populations where more than 3-5% of males are affected [10].

1  
2  
3 78 G6PD deficiency is particularly prevalent among neonates from tropical regions [11], where clinical  
4  
5 79 care is often provided in a non-tertiary hospital or clinic context. Knowledge of G6PD status by medical  
6  
7 80 staff and parents can aid in avoiding potentially haemolytic antibiotics or other agents (such as  
8  
9 81 naphthalene), improved follow-up, and heightened awareness of signs and symptoms of severe NH.

11  
12 82 G6PD deficiency is very common among the Karen and Burman population along the Thailand-  
13  
14 83 Myanmar border (9-18% in males, [12]) where it is associated with an increased risk to develop NH  
15  
16 84 requiring phototherapy both in G6PD deficient (over 4-fold [13]) and in heterozygous females (over 2-  
17  
18 85 fold [5]) as compared to wild type genotype neonates. In a recent study, screening of G6PD by  
19  
20 86 qualitative Fluorescent Spot Test (FST) on cord blood failed to identify almost 10% of G6PD deficient  
21  
22 87 neonates [14].

23  
24  
25  
26  
27 88 Demonstrating usability of new quantitative Point-Of-Care (POC) G6PD diagnostic tests by locally  
28  
29 89 trained clinical staff can inform clinical deployment in this setting and in other rural settings. This study  
30  
31 90 assessed the technical performance and usability of the “G6PD STANDARD” (SD Biosensor, Korea) test  
32  
33 91 when used by trained midwives in two clinics along the Thailand-Myanmar border.

## 34 35 36 37 92 MATERIALS AND METHODS

### 38 39 93 Study design

40  
41 94 A mixed-methods study was conducted to evaluate both the technical performance of the “G6PD  
42  
43 95 STANDARD” (SD Biosensor, Korea) test (henceforth “Biosensor”) and its usability by midwives in a non-  
44  
45 96 tertiary setting. G6PD enzymatic activity and haemoglobin concentration measured by the device were  
46  
47 97 compared to the gold standard reference spectrophotometric assay and haematology analyser,  
48  
49 98 respectively. Performance of the G6PD fluorescent spot test (FST) currently used routinely at the point-  
50  
51 99 of-care, was also compared to the reference and new test.

52  
53  
54  
55 100 Following local staff training, user proficiency was assessed before study start; usability was explored  
56  
57 101 using focus group discussions (FGD) at the end of the study.

## 102 Study setting and population

103 The study was conducted in SMRU clinics situated along the Thailand-Myanmar border in Tak province  
104 (Thailand) where free antenatal care and birthing services are provided for migrant women of  
105 predominantly Karen and Burman ethnicity.

106 SMRU midwives come from the same population as the pregnant women and patients seeking care at  
107 SMRU clinics. The majority of midwives have primary or secondary education and receive clinical  
108 training on-site. Pregnant women attending SMRU clinics at Wang Pha (WPA) and Maw Ker Thai (MKT)  
109 were informed about the study at regular antenatal care visits in the 3<sup>rd</sup> trimester. Informed consent  
110 procedures and eligibility assessments for mothers were completed before labour commenced.  
111 Eligibility of neonates was assessed immediately after delivery, and those born at an estimated  
112 gestational age (EGA) by ultrasound  $\geq 35$  weeks with no severe maternal complications at delivery and  
113 no severe neonatal illness were included. In order to allow laboratory analyses to be performed within  
114 30 hours from collection, only neonates born during week days were included. For all neonates,  
115 indication for starting phototherapy treatment followed the recommendations of the UK NICE  
116 guidelines [15].

## 117 Blood analyses for technical evaluation of Biosensor

118 Two milliliters of cord blood were collected into EDTA from the umbilical cord using an established  
119 SMRU SOP. An aliquot of anticoagulated blood was used by the midwives in the delivery room for the  
120 Biosensor following manufacturer's instructions within one hour of collection (Appendix 1). Tests were  
121 repeated if the test result was an error or "HI" (a result obtained when G6PD activity is very high,  
122 outside the instrument analytic range). High-level and low-level Biosensor controls were run weekly or  
123 monthly (depending on availability) from April 2020 until May 2021.

124 An aliquot of anticoagulated blood was analysed by G6PD fluorescent spot test (FST) at the clinical  
125 laboratory. The remaining blood was stored at 4°C until shipment to the central SMRU laboratory on  
126 the same day.



1  
2  
3 127 Gold standard reference testing for G6PD and haemoglobin were performed by spectrophotometric  
4  
5 128 assay and haematology analyser (with complete blood and reticulocyte counts), respectively, at the  
6  
7 129 SMRU central laboratory.

9  
10 130 G6PD spectrophotometric assay was performed using Pointe Scientific kits (assay kit # G7583-180, Lysis  
11  
12 131 Buffer # G7583-LysSB). Kinetic determination of G6PD activity at 340 nm was performed using a  
13  
14 132 SHIMAZU UV-1800 spectrophotometer with temperature controlled cuvette compartment (30°C).  
15  
16 133 Samples were analysed in double and mean activity was expressed in IU/gHb using the Hb  
17  
18 134 concentration obtained by complete blood count analysis. The final result was calculated using  
19  
20 135 manufacturer's Temperature Control Factor of 1.37. Two controls (Normal, Intermediate or Deficient;  
21  
22 136 Analytic Control Systems, Inc. USA) were analysed at every run and results compared to expected  
23  
24 137 ranges provided by manufacturer. Complete blood count was performed using a CeltacF MEK-8222K  
25  
26 138 haematology analyser (Nihon Kohden, Japan). Three-levels quality controls were run every day and  
27  
28 139 device maintenance and calibration were performed regularly. Reticulocytes were analysed by  
29  
30 140 microscopy after staining with supervital staining Crystal Violet.

31  
32  
33  
34 141 Buffy coat recovered from whole blood after centrifugation was stored at -20°C for later DNA  
35  
36 142 extraction using standard columns kit (Favorgen Biotech, Taiwan). Genotyping for G6PD common  
37  
38 143 mutations was performed through established SOPs [16]. Mahidol mutation was analysed in all  
39  
40 144 samples. Other mutations were only analysed in phenotypically deficient or intermediate samples  
41  
42 145 (G6PD < 9.31IU/gHb by reference test) with wild type or heterozygote Mahidol genotypes. Viangchan,  
43  
44 146 Chinese-4, Kaiping, Canton, Union and Mediterranean were analysed first and full gene sequence was  
45  
46 147 performed if none of these mutations were found.

47  
48  
49  
50 148

### 51 52 53 149 **Biosensor training, user proficiency and usability assessment**

54 150 Midwives of WPA and MKT SMRU clinics were trained for use of Biosensor and were eligible to  
55  
56 151 participate in the usability component of the study following informed consent. Two to four training  
57  
58 152 sessions were provided at each clinic in the local language by an experienced laboratory technician  
59  
60

1  
2  
3 153 (author LA). The sessions lasted from 1 to 2 hours and included a short introduction about the test, a  
4  
5 154 practical demonstration using imitation blood, and supervised use of the biosensor by each midwife.  
6  
7 155 Midwives were allowed to practice the procedure the week following the training prior to taking a user  
8  
9 156 proficiency test. The proficiency test was administered by author LA in the local language and it  
10  
11 157 consisted of a questionnaire (modified from a questionnaire developed by PATH  
12  
13 158 ([https://www.finddx.org/wp-content/uploads/2020/09/PATH\\_STANDARD-G6PD-User-Competency-](https://www.finddx.org/wp-content/uploads/2020/09/PATH_STANDARD-G6PD-User-Competency-Assessment-quiz_08oct19.pdf)  
14  
15 159 [Assessment-quiz\\_08oct19.pdf](https://www.finddx.org/wp-content/uploads/2020/09/PATH_STANDARD-G6PD-User-Competency-Assessment-quiz_08oct19.pdf)) and direct observation of two consecutive tests. Midwives were asked  
16  
17 160 to explain out-loud their actions while performing the first test. The proficiency test was analysed by  
18  
19 161 authors GB and GG and midwives who scored <85% were re-trained before study start. A visual aid  
20  
21 162 with all critical steps of the procedure was printed and available in the delivery room during the study.  
22  
23 163 The usability component of the study followed the conceptual framework for acceptance and use of a  
24  
25 164 rapid diagnostic test for malaria proposed by Asimwe et al. [17] that evaluates 6 components:  
26  
27 165 learnability, willingness, suitability, satisfaction, efficacy, and effectiveness. The focus group  
28  
29 166 discussions (FGD) specifically focused on 4 main themes of learnability, willingness, satisfaction, and  
30  
31 167 suitability. Due to COVID, only two of the planned six total FGD were conducted. The midwives were  
32  
33 168 grouped by their seniority, with senior and junior midwives together, and midwife assistants in a  
34  
35 169 separate group in order to encourage honest and open conversation. One researcher (KKA) facilitated  
36  
37 170 the FGD while an experienced assistant took notes; both were fluent in Burmese and Karen languages  
38  
39 171 used in the FGD. Immediately following the FGD, research staff debriefed and noted main themes of  
40  
41 172 the discussion. FGDs were audio-recorded and subsequently translated and transcribed in English. Two  
42  
43 173 researchers (MG and GB) independently analysed the transcript using thematic analysis based on the  
44  
45 174 pre-set framework [17] using Taguette (a free and open access qualitative data analysis software,  
46  
47 175 <https://joss.theoj.org/papers/10.21105/joss.03522>) and confirmed findings with the KKA. Face-to-face  
48  
49 176 meeting and exchange of notes allowed for triangulation between the researchers.  
50  
51  
52  
53  
54  
55  
56  
57  
58  
59  
60

## 177 Blood analysis for assessment of neonatal hyperbilirubinaemia

178 Routine clinical care for newborns included at least one total serum bilirubin (TSB) test before  
179 discharge (around 48h of life) using capillary blood measured on-site by the rapid quantitative  
180 bilirubinometer BR-501 (Apel Co. Ltd, Japan).

## 182 Sample size and statistical analyses

183 The expected prevalence of G6PD deficiency in the population living at the border is 9-18% in males  
184 and 2-4% in female [12, 16] corresponding to approximately 20-30% heterozygous females, 60% of  
185 whom have intermediate activity [18]. Assuming that the proportion of females and males in the  
186 neonate population is 50%, 9% were expected to be G6PD deficient and 7% to be G6PD intermediate.  
187 In order to obtain 95% CI of the limits of agreement within 0.5 SD of the difference, about 31 neonates  
188 with deficiency and 25 with intermediate phenotypes were needed, with a minimum total sample size  
189 of 350 samples.

190 Clinical data were double entered in MACRO and collated with laboratory data; data were analysed  
191 using SPSSv27.

192 Male median (MM) was calculated in all males with wild type genotypes in both the references  
193 spectrophotometric assay and the Biosensor. Deficiency was defined as enzymatic activity below 30%  
194 of MM by reference spectrophotometry and receiving operator characteristic (ROC)-derived 30%  
195 threshold by Biosensor; intermediate phenotypes were defined as enzymatic activity between 30%  
196 and 70% of the MM or ROC-derived threshold.

197 Mean and standard deviation (SD) were reported for continuous variables. Categorical variables were  
198 compared by Chi-squared test and ANOVA. Bland-Altman plot was used to inspect correspondence  
199 between G6PD activity detected by Biosensor compared to the spectrophotometry assay [19].  
200 Correlation was assessed using Pearson's coefficient of correlation and Interclass Correlation  
201 Coefficient (ICC). Area under the curve (AUC) of the ROC curve [20] was calculated at different activity  
202 thresholds to analyse clinical performances (i.e. sensitivity and specificity) of the Biosensor. Cohen's

203 Kappa coefficient was calculated for categories of phenotypes identified by Biosensor and  
204 spectrophotometry.

205 For analysis of haematologic features and risk of neonatal hyperbilirubinaemia, neonates gestational  
206 ages assessed by ultrasound were categorized as  $\leq 38$  and  $>38$  weeks according to epidemiologic  
207 studies conducted previously in the same population [21].

208 Statistical significance was assessed at the 5% level.

### 209 Patient and Public Involvement statement

210 At the outset of the study, the research team engaged the local population through a local ethics and  
211 research advisory committee, the Tak Province Community Advisory Board, Thailand. This group is  
212 comprised of community leaders, and were asked to advise on study design, process, and outcomes  
213 of interest, and subsequently approved the study (TCAB201904).

## 214 RESULTS

215 A total of 331 cord blood samples were collected between April 2020 and November 2021; six were  
216 clotted and excluded from all analysis. Of the remaining 325 samples, 257 (79%) were collected in MKT  
217 clinic and 68 in WPA clinic, in 166 (51%) female and 159 male neonates. Mean (SD) of estimated  
218 gestational age of newborns was 39.1 (1.0) weeks.

### 219 General haematologic characteristics

220 As expected for this specimen, haematological characteristics of cord blood (Table 1) show higher  
221 white blood cell count, haemoglobin concentrations, reticulocyte counts and larger cellular volumes  
222 compared to adult blood. Reticulocyte counts and red cell distribution width were higher in neonates  
223  $<38$  weeks gestational age ( $P=0.02$  and  $P=0.01$  respectively) while the other indexes did not differ by  
224 gestational age groups.

225

226

227 **Table 1.** Haematologic characteristics of cord blood samples according to newborn gestational age. Results are shown as mean (SD)

| EGA (weeks)               | N*  | WBC (10 <sup>3</sup> / uL) | NEU (10 <sup>3</sup> / uL) | LYM (10 <sup>3</sup> / uL) | RBC (10 <sup>6</sup> / uL) | HGB (g/dL)    | HCT (%)       | MCV (fL)       | MCH (pg)      | MCHC (g/dL)   | RDW (%)       | PLT (10 <sup>3</sup> / uL) | Reticulocyte (%) |
|---------------------------|-----|----------------------------|----------------------------|----------------------------|----------------------------|---------------|---------------|----------------|---------------|---------------|---------------|----------------------------|------------------|
| <38                       | 19  | 13.1<br>(3.6)              | 9.6<br>(3.3)               | 2.7<br>(1.7)               | 4.3<br>(0.4)               | 14.4<br>(1.7) | 48.0<br>(5.4) | 110.9<br>(6.6) | 33.2<br>(2.7) | 29.9<br>(1.5) | 16.8<br>(1.5) | 259.2<br>(66.2)            | 2.8<br>(1.8)     |
| ≥38                       | 298 | 14.3<br>(3.8)              | 10.8<br>(3.6)              | 2.8<br>(1.6)               | 4.5<br>(0.5)               | 14.5<br>(1.7) | 49.0<br>(5.2) | 109.0<br>(7.9) | 32.3<br>(3.0) | 29.6<br>(1.4) | 16.0<br>(1.2) | 261.4<br>(47.7)            | 2.1<br>(1.1)     |
| <i>P</i> <sub>ANOVA</sub> |     | 0.17                       | 0.16                       | 0.88                       | 0.14                       | 0.68          | 0.43          | 0.30           | 0.21          | 0.41          | 0.01          | 0.85                       | 0.02             |

228

229 \* Number of samples analysed by haematology analyser was 317 out of 325; 7 samples were analysed by Hemocue and result used to calculate G6PD  
 230 enzymatic activity.

231

## 232 G6PD genotypes

233 A total of 26 hemizygous mutated males (21 Mahidol, 2 Kaiping, 1 Viangchan, 1 Coimbra, 1 Orissa), 3  
234 homozygous mutated females (Mahidol), 34 heterozygous females (32 Mahidol, 1 Canton, 1  
235 Viangchan) and 262 wild type (129 females and 133 males) were found. Overall allelic frequency of all  
236 mutated alleles was 13.4%. The distribution of G6PD activity by spectrophotometry and biosensor  
237 associated with different genotypes are shown in Figures 1 and Supplementary Tables 1 and 2.

## 238 Fluorescent spot test

239 The poor performances of the FST in cord blood were confirmed here, with the FST failing to identify  
240 23% (7/30) of deficient neonates and 100% of the intermediate females (22/22; Table 2).

## 241 Technical evaluation of Biosensor

### 242 Male medians by reference spectrophotometric assay and Biosensor

243 MM G6PD activity by spectrophotometer was 13.3 IU/gHb giving a 30% threshold of 4.0 IU/gHb for  
244 diagnosis of deficiency; intermediate activity (30-70%) in females ranged between 4.1 and 9.3 IU/gHb.  
245 The cord blood-specific 30% spectrophotometric threshold identified all the hemizygous male and  
246 homozygous female newborns (Figure 1A).

247 MM of G6PD activity by Biosensor calculated on 307 samples was 14.4 IU/gHb giving a 30% threshold  
248 of 4.3 IU/gHb for diagnosis of deficiency. Intermediate activity (30-70%) in females ranged between  
249 4.4 and 10.1 IU/gHb (Figure 1B).

250 In 7% of cases (23/325), the Biosensor provided an initial result of "HI" activity without a numeric value.  
251 Of the 19 samples retested, 14 had "HI" results again and 5 samples had an activity ranging from 17.3  
252 to 20.0 IU/gHb; all samples with initial or confirmed "HI" results were normal by spectrophotometry  
253 and had a wild type genotype. Overall, 18 samples (5.5% of the total) did not have a final numeric  
254 result by Biosensor but would have been considered "normal", according to the spectrophotometric  
255 assay.

## 256 Biosensor performance

257 Biosensor performance was assessed for 307/325 samples that yielded numeric results. The mean  
258 ( $\pm 1.96SD$ ) difference in enzymatic activity between Biosensor and spectrophotometry was 1.05 IU/gHb  
259 (LoA: -3.52 to 5.62 IU/gHb) as represented in the Bland-Altman plot in Figure 2A. A very strong  
260 correlation between enzymatic activity by Biosensor and reference spectrophotometry was observed  
261 (Pearson's  $r=0.855$ ,  $p<0.001$ ; ICC=0.905,  $p<0.001$ ).

262 The mean ( $\pm 1.96SD$ ) difference in Hb between the Biosensor and haematology analyser was 0.70 g/dL  
263 (LoA: -2.83 to 4.23 g/dL) (Figure 2B). A moderate correlation between Hb levels by Biosensor and  
264 haematology analyser was observed (Pearson's  $r=0.637$ ,  $p<0.001$ ; ICC=0.728,  $p<0.001$ ).

265 Area under the curve (AUC) of the ROC analysis (Figure 3A) of the 30% threshold was 0.999 (95%CI:  
266 0.997-1.000); ROC analysis showed that 30% of Biosensor MM (4.3IU/gHb) was associated with  
267 sensitivity of 0.931 (95%CI: 0.758-0.988) and specificity of 0.989 (95%CI: 0.966-0.997) while a threshold  
268 of 4.8IU/gHb had a sensitivity of 1.000 (95%CI: 0.859-1.000) and a specificity of 0.993 (95% CI: 0.971-  
269 0.999). This second threshold was therefore used for the subsequent analyses.

270 AUC of the ROC analysis (Figure 3B) for the 70% threshold was 0.972 (95%CI: 0.949-0.994) and ROC  
271 analysis showed that a threshold of 9.9IU/gHb had a better sensitivity and specificity as compared to  
272 the 70% of Biosensor MM (10.1 IU/gHb). The ROC-derived threshold had a sensitivity of 0.842 (95%CI:  
273 0.716-0.921) and specificity of 0.984 (95%CI: 0.957-0.995) to identify samples with  $\leq 70\%$  activity and  
274 was used for subsequent analyses.

275 AUC of the ROC analysis for the range 30-70% activity was 0.935 (95%CI: 0.887-0.983); sensitivity and  
276 specificity for intermediate phenotypes in females were 0.727 (95%CI 0.498-0.893) and 0.933 (95%CI:  
277 0.876-0.969) respectively based on ROC-derived thresholds as compared to 0.592 (95%CI: 0.390-0.770)  
278 and 0.953 (95%CI: 0.897-0.980) using Biosensor MM thresholds.

279 When comparing phenotypes defined according to the 30% and 70% thresholds of spectrophotometry  
280 and ROC-derived threshold for Biosensor (Table 2), the Biosensor correctly identified all deficient and

281 normal males and all deficient females. In females, the Biosensor incorrectly identified 9% (2/22) of  
 282 intermediate females (activity by spectrophotometry 33% and 62%) as deficient, and 7% (9/130) of  
 283 phenotypically normal female neonates as intermediate (activity by spectrophotometer ranging from  
 284 71% to 113%). It also misdiagnosed 18% (4/22) of intermediate samples as normal. Of these 4 samples,  
 285 3 were Mahidol heterozygotes and 1 was a wild type and their enzymatic activity by  
 286 spectrophotometry ranged from 54% to 64%. Cohen's kappa coefficient was 0.841,  $p < 0.001$ . Overall,  
 287 the majority of samples with discordant results (11/15) were identified by the Biosensor as having a  
 288 "worse" phenotype. Characteristics of the 15 samples with discordant results are reported in  
 289 Supplementary Table 3.

290

291 **Table 2.** Diagnostic performance of FST and Biosensor as compared to gold standard  
 292 spectrophotometry.

293

294

295

296

297

298

299

300

301

302

|                  |              | <i>Spectrophotometry</i> |            |           |                    |                |
|------------------|--------------|--------------------------|------------|-----------|--------------------|----------------|
|                  |              | Male                     |            | Female    |                    |                |
|                  |              | Deficient                | Normal     | Deficient | Intermediate       | Normal         |
| <b>FST</b>       | Deficient    | 20                       | 0          | 2         | 0                  | 0              |
|                  | Normal       | 6*                       | 133        | 2*        | 22                 | 137            |
|                  | Total        | <b>26</b>                | <b>133</b> | <b>4</b>  | <b>22</b>          | <b>137</b>     |
| <b>Biosensor</b> | Deficient    | 26                       | 0          | 4         | 2 <sup>#</sup>     | 0              |
|                  | Intermediate | NA                       | NA         | 0         | 16                 | 9 <sup>§</sup> |
|                  | Normal       | 0                        | 125        | 0         | 4 <sup>&amp;</sup> | 121            |
|                  | Total        | <b>26</b>                | <b>125</b> | <b>4</b>  | <b>22</b>          | <b>130</b>     |

303 Phenotypes are based on 30% and 70% thresholds for spectrophotometry. For Biosensor, threshold  
 304 for deficiency is  $\leq 4.8$  IU/gHb and 4.9 to 9.9 IU/gHb for intermediate, both obtained by ROC analysis.  
 305 Total sample for Biosensor was 307; total sample for FST was 322 (3 samples were not analysed by  
 306 FST at the clinic)

307

308 \*Enzymatic activities ranging from 12% to 27% of spectrophotometry MM.

309 <sup>#</sup> Two Mahidol heterozygotes with activity by spectrophotometry of 33% and 62% of MM.

310 <sup>§</sup> Two Mahidol heterozygotes and 7 wild type samples with enzymatic activity by spectrophotometry  
 311 ranging from 71% to 113%.

312 <sup>&</sup> Three Mahidol heterozygotes and 1 wild type samples with enzymatic activity by  
 313 spectrophotometry ranging from 54% to 64%.

314 Characteristics of discordant samples are reported in Supplementary Table 1.

315

316



1  
2  
3 317  
4 318  
5  
6 319 No difference in results were observed by clinic (ICC=0.899,  $p<0.001$  in MKT and ICC=0.930,  $p<0.001$  in  
7  
8  
9 320 WPA) or user. In MKT clinic where the test was used over 20 months, a trend of larger absolute mean  
10  
11 321 differences in activity (Biosensor - Spectrophotometry) were observed in the last 4-8 months of use as  
12  
13 322 compared to the first 12 months (Supplementary Figure 1).

### 323 Risk of neonatal hyperbilirubinaemia

324 Risk of neonatal hyperbilirubinemia by phenotype (determined by spectrophotometry) was assessed  
325 in term neonates (EGA $\geq$ 38weeks). A significantly larger proportion of G6PD deficient neonates (29%)  
326 underwent phototherapy for treatment of NH as compared to G6PD normal (6%, RR[95%CI] =4.9 [2.3-  
327 10.5];  $P<0.001$ ). A larger proportion of female neonates with intermediate phenotypes (90% of whom  
328 were heterozygotes) required phototherapy (15%), although in this small cohort the difference did not  
329 reach statistical significance (RR[95%CI] =2.6 [0.8-8.1];  $P=0.13$ ; supplementary Table 4. Relative risk by  
330 quantitative phenotypes were similar to those already established by genotypes in the same  
331 population [5].

### 332 Biosensor training, user proficiency and usability assessment

333 A total of 22 midwives in two clinics were initially trained and completed the users' proficiency test,  
334 including 7 senior, 10 junior and 5 assistant midwives. Median (min-max) observed score from the  
335 questionnaire (max 7 points) and observed tests (max 18 points) was 22.1 (18-24.5). The median score  
336 did not differ by seniority: assistant 21.4 (18.0-23.5), junior 22.0 (19.3-24.5), senior 22.8 (21.0-24.5);  
337 most midwives (72%) had a score  $>21$  points ( $>85\%$  of maximum score). The most common mistakes  
338 in the questionnaire were on how to mix the blood and the buffer (pipetting 10 times vs shaking the  
339 buffer tube) and on volume of blood mixture to transfer into the device. On observation, the most  
340 common mistakes were failure to check the date on Biosensor screen and failure to check test expiry  
341 date (rated as minor mistakes as expired test strips are automatically recognized by the Biosensor and  
342 rejected).

343 Two focus group discussions were held in December 2021 in MKT clinic, four weeks after completion  
 344 of the sample collection at that site; one FGD included 6 senior and junior midwives, and one included  
 345 6 assistant midwives. Discussions on satisfaction, learnability, willingness, and suitability and future  
 346 use are summarized in Table 3. Overall satisfaction was high, although staff were concerned with  
 347 invalid results, and found it challenging to dedicate one member of the team to perform the biosensor  
 348 test in the delivery room in the busy postpartum period. In terms of learnability, the midwife assistants  
 349 reported learning the device more easily, though some were anxious about missing steps. The senior  
 350 staff were anxious about mistakes and clotted blood, and reported the need to refer to the instructions  
 351 as a problem. Contrary to the positive expressions to keep using the device at the clinic, the midwives'  
 352 willingness to use the device was not high and they requested a dedicated staff to perform the test or  
 353 the test to be done in the laboratory. In terms of suitability and future use, the midwives found the  
 354 results clinically useful and a valuable diagnostic tool in both their setting and field clinics. However,  
 355 they were concerned about neglecting clinical care while doing a laboratory test, the cost of the device,  
 356 and emphasized the need for good training.

357 **Table 3.** Selected quotes by theme from focus group discussions.

| Theme           | Quotes                                                                                                                                                                                                                                                                                                                                                                                                                                                                                                  |
|-----------------|---------------------------------------------------------------------------------------------------------------------------------------------------------------------------------------------------------------------------------------------------------------------------------------------------------------------------------------------------------------------------------------------------------------------------------------------------------------------------------------------------------|
| A. Satisfaction | <p>“It is very good for the children. It is good to know if the child has G6PD deficiency or not from birth. The advantage of the device is that it can detect the children without having to do a heel stick on the baby. On the other hand, there is an increase in work.... But now that we are good at using it, it’s fine.” [FGD1]</p> <p>“Sometimes if someone is doing the test by using the device it means there are fewer staffs to be with mothers and babies which is not good.” [FGD1]</p> |
| B. Learnability | <p>“After the one-time training, we had 1 or 2 times experiences practically. Then we can do it.” [FGD2]</p> <p>“I am really scared I will forget the steps.” [FGD2]</p> <p>“We have to look at the book very often, if not we forget the process of what to put and how to put it.” [FGD1]</p>                                                                                                                                                                                                         |
| C. Willingness  | <p>“Facilitator: Yes. What do you think about keeping on using this device in the future?<br/>         Participant: Of course. It is good.<br/>         Participant: Yes, it is good. But if we can have a specific staff to do it then it will be better.” [FGD2]</p> <p>“To make changes, take out the blood and send it to the lab. Then only lab staff have to</p>                                                                                                                                  |

|                             |                                                                                                                                                                                                                                                                                                                                                                                                                                                                                                  |
|-----------------------------|--------------------------------------------------------------------------------------------------------------------------------------------------------------------------------------------------------------------------------------------------------------------------------------------------------------------------------------------------------------------------------------------------------------------------------------------------------------------------------------------------|
|                             | do that.” [FGD1]                                                                                                                                                                                                                                                                                                                                                                                                                                                                                 |
| D. Suitability & Future Use | <p>“Because we can know that early, we can have counseling with the parents about the chances of their children getting yellow skin. We can take time to counsel.” [FGD1]</p> <p>“Because we can know the right result of the G6PD deficiency in a short time. Especially for the clinic which doesn’t have a lab then it is difficult to know the G6PD status. But with this device, they will only need to take a little blood from the baby and they can know the result of G6PD.” [FGD2]</p> |

358

## 359 DISCUSSION

360 This is the first study to assess clinical performance and usability by locally trained health workers of  
 361 the “STANDARD G6PD” Biosensor test for identification of G6PD deficient and intermediate  
 362 phenotypes in cord blood. Current data, together with previously collected evidence from clinical trials  
 363 in the same population [5], clearly indicate that newborn heterozygous girls with G6PD intermediate  
 364 phenotypes, who are not identified by the FST, are at increased risk of NH and require phototherapy  
 365 [7, 8]. The availability of a validated POC quantitative test such as the Biosensor and its inclusion in  
 366 diagnostics guidelines for neonatal care at birth will allow identification of this group of neonates and  
 367 better clinical care in several settings [22-25]. Together with other easy-to-use non-invasive tools for  
 368 diagnosis of NH (e.g. Transcutaneous bilirubinometers), this study provides evidence that Biosensor  
 369 could be used in non-tertiary rural settings for identification of neonates who need referral to higher  
 370 levels of care. In settings where phototherapy is available, this study indicates that the Biosensor is a  
 371 better option than FST to support clinical management of neonates. Technical performance of the  
 372 Biosensor using ROC-derived threshold was comparable to that observed in adult blood in laboratory  
 373 and field studies [26-29].

374 The phenotypic classification provided by the Biosensor was superior to the currently available  
 375 qualitative test (FST) both for deficient and for intermediate phenotypes. Among intermediate  
 376 phenotypes, 80% were identified as either deficient or intermediate, allowing a better identification  
 377 of neonates at potential jaundice risk as compared to the currently used FST-based diagnosis [14, 30].  
 378 Poor performance of FST can be explained by the higher G6PD enzymatic activity at birth as compared

1  
2  
3 379 to adulthood [31, 32]; this is probably the result of several haematological factors including younger  
4  
5 380 red cell age, increased number of reticulocytes with higher G6PD activity [33, 34] and higher WBC  
6  
7 381 count [28] as observed here. Importantly, because of higher enzymatic activity in cord blood,  
8  
9 382 thresholds established in adult blood cannot be used to identify deficient or intermediate phenotypes  
10  
11 383 by either spectrophotometry or Biosensor at birth and would have missed identification of 10% (3/29)  
12  
13 384 deficient neonates (2/26 deficient males and 1/4 deficient females) and 86% (19/22) intermediate  
14  
15 385 females.

16  
17  
18 386 Biosensor haemoglobin values had a moderate correlation with those assessed by automatic  
19  
20 387 haematology analyser. Although cord (and neonatal) blood samples have higher haemoglobin levels  
21  
22 388 and increased viscosity, Biosensor's performance in measuring G6PD activity was not worse at higher  
23  
24 389 haemoglobin levels.

25  
26  
27 390 While the Biosensor provided a numeric result in 94.5% of cases, in few cases an "error" message or a  
28  
29 391 "HI" result was obtained which, according to the protocol, required re-analysis of the sample. Samples  
30  
31 392 that tested "HI" were confirmed to be normal, both phenotypically by spectrophotometry and by  
32  
33 393 genotype (all wild type). In routine practice it will not be needed to repeat the test in samples showing  
34  
35 394 "HI" result should the manufacturers include this information in the instructions for use.

36  
37  
38 395 The usability component highlighted important themes to be taken into consideration for future use  
39  
40 396 of the Biosensor at birth. The midwives have been involved in previous research regarding neonatal  
41  
42 397 jaundice and appreciated the importance of early G6PD diagnosis to identify newborns most at risk of  
43  
44 398 neonatal hyperbilirubinaemia and to facilitate optimal clinical care and parental counselling. The non-  
45  
46 399 invasive nature of cord blood analysis was considered an advantage. In this setting, the SMRU  
47  
48 400 midwives recommended that the test be performed by dedicated staff or by the available laboratory  
49  
50 401 to assure appropriate clinical care is provided to the newborns and mothers; nevertheless, they  
51  
52 402 estimated that in more rural contexts it may be appropriate for trained birth attendants to perform  
53  
54 403 the test. Of note, midwives considered their reliance on reading the visual aid while performing the  
55  
56 404 test (which is standard practice in laboratories) a weakness and this aspect might need to be taken  
57  
58  
59  
60

1  
2  
3 405 into account when training clinic field staff. Usability results obtained here might not be generalizable  
4  
5 406 to every other context but there are data being collected in several rural and community-based  
6  
7 407 settings that corroborate ease of use of this device to guide malaria treatment after appropriate  
8  
9 408 training [26, 35, 36] .  
10

11  
12 409 Although midwives felt uncertain about properly conducting the test at the beginning of the study, the  
13  
14 410 laboratory data showed highly accurate results in the first 12 months of use and very good results in  
15  
16 411 the latter 8 months, supporting suitability of the test among health care workers without prior  
17  
18 412 experience in diagnostics. Follow up studies should explore the causes of this slight decrease in quality  
19  
20 413 over time which could be attributed to environmental or users' factors as well as device durability over  
21  
22 414 >1 year of use in tropical conditions.  
23  
24  
25

26 415

27  
28 416 Limitations

29  
30 417 A practical limitation of Biosensor testing on cord blood is the extra step needed to collect the blood  
31  
32 418 with a syringe from the cord. A sampling device that collects a fixed volume of blood directly from the  
33  
34 419 cord would streamline the process.  
35

36  
37 420 It is very likely that performance and reference ranges observed here in cord blood could apply to  
38  
39 421 neonatal capillary or venous blood collected within the first 24 hours of life but this was not evaluated  
40  
41 422 during the study.  
42

43  
44 423 The study was conducted in a period critically influenced by the COVID-19 pandemic. Travel restrictions  
45  
46 424 resulted in a delayed study start, reduced enrolment in one clinic (WPA), and a protracted enrolment  
47  
48 425 duration of the study overall. Fewer than planned FGD were conducted—including planned discussions  
49  
50 426 at key time points during the study—and they occurred in a single clinical site providing a possibly  
51  
52 427 narrower point of view on the usability topics explored. Additional staff stressors and human resource  
53  
54 428 limitations due to COVID-19 and the political unrest in 2021 were not assessed but may have  
55  
56 429 influenced the results of both the technical and usability components of the study.  
57  
58

59 430  
60

1  
2  
3 431 CONCLUSIONS  
4

5 432 The “STANDARD G6PD” Biosensor is a reliable POC tool to support the perinatal care of newborns at  
6  
7 433 higher risk of neonatal hyperbilirubinemia by demonstrating very high sensitivity in identification of  
8  
9 434 deficient newborns and high sensitivity in identification of female newborns with intermediate activity.  
10  
11 435 Its use by trained personnel in rural clinics and birthing centers with a high prevalence of G6PD  
12  
13 436 deficiency, together with assessment of bilirubin levels before discharge, has the potential to avert  
14  
15 437 disability and death from hyperbilirubinaemia.  
16  
17

18  
19 438 Extending use of the Biosensor for newborn testing in countries where it is already deployed for  
20  
21 439 malaria case management in resource-constrained settings [37], would provide a higher return on this  
22  
23 440 investment. Use of Biosensor in populations with prevalent G6PD deficiency outside malaria endemic  
24  
25 441 regions might increase the benefit-cost ratio of universal screening [38] in all settings [39].  
26  
27  
28  
29 442

30  
31  
32  
33 443 ACKNOWLEDGMENTS

34 444 The authors wish to thank all the mothers for their collaboration and understanding; the study would  
35  
36 445 not have been possible without the hard work and dedication of all SMRU staff involved, especially  
37  
38 446 during such a difficult time of political unrest and COVID-19 pandemic. Acknowledgments are also  
39  
40 447 extended to SD Biosensor for donating the devices and the tests for the study.  
41  
42  
43  
44

45 448 ETHICAL APPROVAL

46  
47  
48 449 The study was approved by Oxford Tropical Research Ethics Committee, UK (OxTREC 532-19), the  
49  
50 450 Mahidol University Faculty of Tropical Medicine Ethics Committee, Thailand (TMEC 19-048, MUTM  
51  
52 451 2019-080-02) and the Tak Province Border Community Ethics Advisory Board (TCAB201904). Written  
53  
54 452 informed consent was obtained from literate mothers and midwives; a thumbprint was obtained in  
55  
56 453 the presence of a literate witness for illiterate mothers.  
57  
58  
59  
60

1  
2  
3 454 **AUTHORS' CONTRIBUTION**  
4

5 455 Substantial contributions to the conception or design of the work: GB, AH, FN, VIV and RM.

6  
7 456 Acquisition, analysis or interpretation of data for the work: GB, MEG, EW, GG, PP, PKM, LA, NSW, SW,

8  
9 457 KKA, AH, BH, FN, VIC and RM. Drafting the work or revising it critically for important intellectual

10  
11 458 content: GB, MEG, EW, GG, PP, PKM, LA, NSW, SW, KKA, AH, BH, FN, VIC and RM. Final approval of

12  
13 459 the version to be published: all authors. Agreement to be accountable for all aspects of the work in

14  
15 460 ensuring that questions related to the accuracy or integrity of any part of the work are appropriately

16  
17 461 investigated and resolved: all authors.  
18  
19  
20  
21  
22

23 462 **COMPETING INTERESTS**

24  
25 463 None declared.  
26  
27

28 464 **FUNDING**

29  
30 465 The study was supported by a grant to GB by the Wellcome Trust Institutional Translational Partnership

31  
32 466 Awards: Thailand Major Overseas Programme (WT-ITP-2019/004). SMRU is supported by the

33  
34 467 Wellcome Trust [grant 220111]. For the purpose of Open Access, the authors have applied a CC BY

35  
36 468 public copyright licence to any author accepted manuscript version arising from this submission. The

37  
38 469 funders had no role in study design, data collection and analysis, decision to publish, or preparation of

39  
40 470 the manuscript.  
41  
42  
43  
44  
45

46 471 **DATA AVAILABILITY STATEMENT**

47 472 De-identified participant data are available from the Mahidol Oxford Tropical Medicine Data Access

48  
49 473 Committee upon request from this link: <https://www.tropmedres.ac/units/moru-bangkok/bioethics->

50  
51 474 [engagement/datasharing](https://www.tropmedres.ac/units/moru-bangkok/bioethics-engagement/datasharing).  
52  
53  
54  
55  
56  
57  
58  
59  
60

## 476 REFERENCES

- 478 1. Bhutani VK, Zipursky A, Blencowe H, Khanna R, Sgro M, Ebbesen F, et al. Neonatal  
479 hyperbilirubinemia and Rhesus disease of the newborn: incidence and impairment estimates  
480 for 2010 at regional and global levels. *Pediatric research*. 2013;74 Suppl 1:86-100.
- 481 2. Bhutani VK, Vilms RJ, Hamerman-Johnson L. Universal bilirubin screening for severe  
482 neonatal hyperbilirubinemia. *J Perinatol*. 2010;30 Suppl:S6-15.
- 483 3. Olusanya BO, Kaplan M, Hansen TWR. Neonatal hyperbilirubinaemia: a global  
484 perspective. *Lancet Child Adolesc Health*. 2018;2(8):610-20.
- 485 4. Lauer BJ, Spector ND. Hyperbilirubinemia in the newborn. *Pediatr Rev*.  
486 2011;32(8):341-9.
- 487 5. Bancone G, Gornsawun G, Peerawaranun P, Penpitchaporn P, Paw MK, Poe DD, et al.  
488 Contribution of genetic factors to high rates of neonatal hyperbilirubinaemia on the  
489 Thailand-Myanmar border. *Plos Global Public Health*. 2022.
- 490 6. Cappellini MD, Fiorelli G. Glucose-6-phosphate dehydrogenase deficiency. *Lancet*.  
491 2008;371(9606):64-74.
- 492 7. Kaplan M, Hammerman C, Vreman HJ, Stevenson DK, Beutler E. Acute hemolysis and  
493 severe neonatal hyperbilirubinemia in glucose-6-phosphate dehydrogenase-deficient  
494 heterozygotes. *The Journal of pediatrics*. 2001;139(1):137-40.
- 495 8. Meloni T, Forteleoni G, Dore A, Cutillo S. Neonatal hyperbilirubinaemia in  
496 heterozygous glucose-6-phosphate dehydrogenase deficient females. *British journal of*  
497 *haematology*. 1983;53(2):241-6.
- 498 9. Molou E, Schulpis KH, Thodi G, Georgiou V, Dotsikas Y, Papadopoulos K, et al.  
499 Glucose-6-Phosphate Dehydrogenase (G6PD) deficiency in Greek newborns: the  
500 Mediterranean C563T mutation screening. *Scandinavian journal of clinical and laboratory*  
501 *investigation*. 2014;74(3):259-63.
- 502 10. WHO Working Group. Glucose-6-phosphate dehydrogenase deficiency. *Bulletin of*  
503 *the World Health Organization*. 1989;67(6):601-11.
- 504 11. Howes RE, Piel FB, Patil AP, Nyangiri OA, Gething PW, Dewi M, et al. G6PD deficiency  
505 prevalence and estimates of affected populations in malaria endemic countries: a  
506 geostatistical model-based map. *PLoS medicine*. 2012;9(11):e1001339.
- 507 12. Bancone G, Chu CS, Somsakchaichaoen R, Chowwiwat N, Parker DM,  
508 Charunwatthana P, et al. Characterization of G6PD Genotypes and Phenotypes on the  
509 Northwestern Thailand-Myanmar Border. *PloS one*. 2014;9(12):e116063.
- 510 13. Turner C, Carrara V, Aye Mya Thein N, Chit Mo Mo Win N, Turner P, Bancone G, et al.  
511 Neonatal intensive care in a Karen refugee camp: a 4 year descriptive study. *PloS one*.  
512 2013;8(8):e72721.
- 513 14. Thielemans L, Gornsawun G, Hanboonkunupakarn B, Paw MK, Porn P, Moo PK, et al.  
514 Diagnostic performances of the fluorescent spot test for G6PD deficiency in newborns along  
515 the Thailand-Myanmar border: A cohort study. *Wellcome open research*. 2018;3:1.
- 516 15. Health NCCfWsCs. NICE. Neonatal jaundice: clinical guideline2010.
- 517 16. Bancone G, Chowwiwat N, Somsakchaichaoen R, Poodpanya L, Moo PK, Gornsawun  
518 G, et al. Single Low Dose Primaquine (0.25mg/kg) Does Not Cause Clinically Significant  
519 Haemolysis in G6PD Deficient Subjects. *PloS one*. 2016;11(3):e0151898.
- 520 17. Asiimwe C, Kyabayinze DJ, Kyalisiima Z, Nabakooza J, Bajabaite M, Counihan H, et al.  
521 Early experiences on the feasibility, acceptability, and use of malaria rapid diagnostic tests at



- 1  
2  
3 522 peripheral health centres in Uganda-insights into some barriers and facilitators. *Implement*  
4 523 *Sci.* 2012;7:5.
- 5 524 18. Bancone G, Gilder ME, Chowwiwat N, Gornsawun G, Win E, Cho WW, et al.  
6 525 Prevalences of inherited red blood cell disorders in pregnant women of different ethnicities  
7 526 living along the Thailand-Myanmar border. *Wellcome open research.* 2017;2:72.
- 8 527 19. Bland JM, Altman DG. Statistical methods for assessing agreement between two  
9 528 methods of clinical measurement. *Lancet.* 1986;1(8476):307-10.
- 10 529 20. Kumar R, Indrayan A. Receiver operating characteristic (ROC) curve for medical  
11 530 researchers. *Indian pediatrics.* 2011;48(4):277-87.
- 12 531 21. Thielemans L, Peerawaranun P, Mukaka M, Paw MK, Wiladphaingern J, Landier J, et  
13 532 al. High levels of pathological jaundice in the first 24 hours and neonatal hyperbilirubinaemia  
14 533 in an epidemiological cohort study on the Thailand-Myanmar border. *PloS one.*  
15 534 2021;16(10):e0258127.
- 16 535 22. Aynalem YA, Mulu GB, Akalu TY, Shiferaw WS. Prevalence of neonatal  
17 536 hyperbilirubinaemia and its association with glucose-6-phosphate dehydrogenase deficiency  
18 537 and blood-type incompatibility in sub-Saharan Africa: a systematic review and meta-analysis.  
19 538 *BMJ Paediatr Open.* 2020;4(1):e000750.
- 20 539 23. Bernardo J, Nock M. Pediatric Provider Insight Into Newborn Screening for Glucose-6-  
21 540 Phosphate Dehydrogenase Deficiency. *Clin Pediatr (Phila).* 2015;54(6):575-8.
- 22 541 24. DelFavero JJ, Jnah AJ, Newberry D. Glucose-6-Phosphate Dehydrogenase Deficiency  
23 542 and the Benefits of Early Screening. *Neonatal Netw.* 2020;39(5):270-82.
- 24 543 25. Wong RJ, Montiel C, Kunda M, Stevenson DK, Bhutani VK. A novel point-of-care  
25 544 device for measuring glucose-6-phosphate dehydrogenase enzyme deficiency. *Semin*  
26 545 *Perinatol.* 2021;45(1):151356.
- 27 546 26. Alam MS, Kibria MG, Jahan N, Thriemer K, Hossain MS, Douglas NM, et al. Field  
28 547 evaluation of quantitative point of care diagnostics to measure glucose-6-phosphate  
29 548 dehydrogenase activity. *PloS one.* 2018;13(11):e0206331.
- 30 549 27. Pal S, Bansil P, Bancone G, Hrutkay S, Kahn M, Gornsawun G, et al. Evaluation of a  
31 550 Novel Quantitative Test for Glucose-6-Phosphate Dehydrogenase Deficiency: Bringing  
32 551 Quantitative Testing for Glucose-6-Phosphate Dehydrogenase Deficiency Closer to the  
33 552 Patient. *The American journal of tropical medicine and hygiene.* 2019;100(1):213-21.
- 34 553 28. Pal S, Myburgh J, Bansil P, Hann A, Robertson L, Gerth-Guyette E, et al. Reference and  
35 554 point-of-care testing for G6PD deficiency: Blood disorder interference, contrived specimens,  
36 555 and fingerstick equivalence and precision. *PloS one.* 2021;16(9):e0257560.
- 37 556 29. Zobrist S, Brito M, Garbin E, Monteiro WM, Clementino Freitas S, Macedo M, et al.  
38 557 Evaluation of a point-of-care diagnostic to identify glucose-6-phosphate dehydrogenase  
39 558 deficiency in Brazil. *PLoS neglected tropical diseases.* 2021;15(8):e0009649.
- 40 559 30. Kosaryan M, Mahdavi MR, Jalali H, Roshan P. Why does the Iranian national program  
41 560 of screening newborns for G6PD enzyme deficiency miss a large number of affected infants?  
42 561 *Pediatric hematology and oncology.* 2014;31(1):95-100.
- 43 562 31. Doherty AN, Kring EA, Posey YF, Maisels MJ. Glucose-6-phosphate dehydrogenase  
44 563 activity levels in white newborn infants. *The Journal of pediatrics.* 2014;164(6):1416-20.
- 45 564 32. Kaplan M, Abramov A. Neonatal hyperbilirubinemia associated with glucose-6-  
46 565 phosphate dehydrogenase deficiency in Sephardic-Jewish neonates: incidence, severity, and  
47 566 the effect of phototherapy. *Pediatrics.* 1992;90(3):401-5.
- 48 567 33. Ellis D, Sewell CE, Skinner LG. Reticulocyte enzymes and protein synthesis. *Nature.*  
49 568 1956;177(4500):190-1.
- 50  
51  
52  
53  
54  
55  
56  
57  
58  
59  
60

- 1  
2  
3 569 34. Srivastava A, Evans KJ, Sexton AE, Schofield L, Creek DJ. Metabolomics-Based  
4 570 Elucidation of Active Metabolic Pathways in Erythrocytes and HSC-Derived Reticulocytes.  
5 571 Journal of proteome research. 2017;16(4):1492-505.  
6  
7 572 35. Engel N, Ghergu C, Matin MA, Kibria MG, Thriemer K, Price RN, et al. Implementing  
8 573 radical cure diagnostics for malaria: user perspectives on G6PD testing in Bangladesh.  
9 574 Malaria journal. 2021;20(1):217.  
10  
11 575 36. Gerth-Guyette E, Adissu W, Brito M, Garbin E, Macedo M, Sharma A, et al. Usability  
12 576 of a point-of-care diagnostic to identify glucose-6-phosphate dehydrogenase deficiency: a  
13 577 multi-country assessment of test label comprehension and results interpretation. Malaria  
14 578 journal. 2021;20(1):307.  
15  
16 579 37. Chu CS, Bancone G, Kelley M, Advani N, Domingo GJ, Cutiongo-de la Paz EM, et al.  
17 580 Optimizing G6PD testing for Plasmodium vivax case management: why sex, counseling, and  
18 581 community engagement matter. Wellcome open research. 2020;5:21.  
19  
20 582 38. Vidavalur R, Bhutani VK. Economic evaluation of point of care universal newborn  
21 583 screening for glucose-6-Phosphate dehydrogenase deficiency in United States. J Matern  
22 584 Fetal Neonatal Med. 2021:1-9.  
23  
24 585 39. Watchko JF, Kaplan M, Stark AR, Stevenson DK, Bhutani VK. Should we screen  
25 586 newborns for glucose-6-phosphate dehydrogenase deficiency in the United States? J  
26 587 Perinatol. 2013;33(7):499-504.  
27  
28  
29  
30  
31  
32  
33  
34  
35  
36  
37  
38  
39  
40  
41  
42  
43  
44  
45  
46  
47  
48  
49  
50  
51  
52  
53  
54  
55  
56  
57  
58  
59  
60

Quantitative G6PD point-of-care test can be used reliably on cord blood to identify male and female newborns at increased risk of neonatal hyperbilirubinaemia: a mixed method study

Figure 1. Distribution of G6PD enzymatic activity from cord blood samples detected by gold standard spectrophotometry assay (A) and Biosensor (B) according to sex and genotype

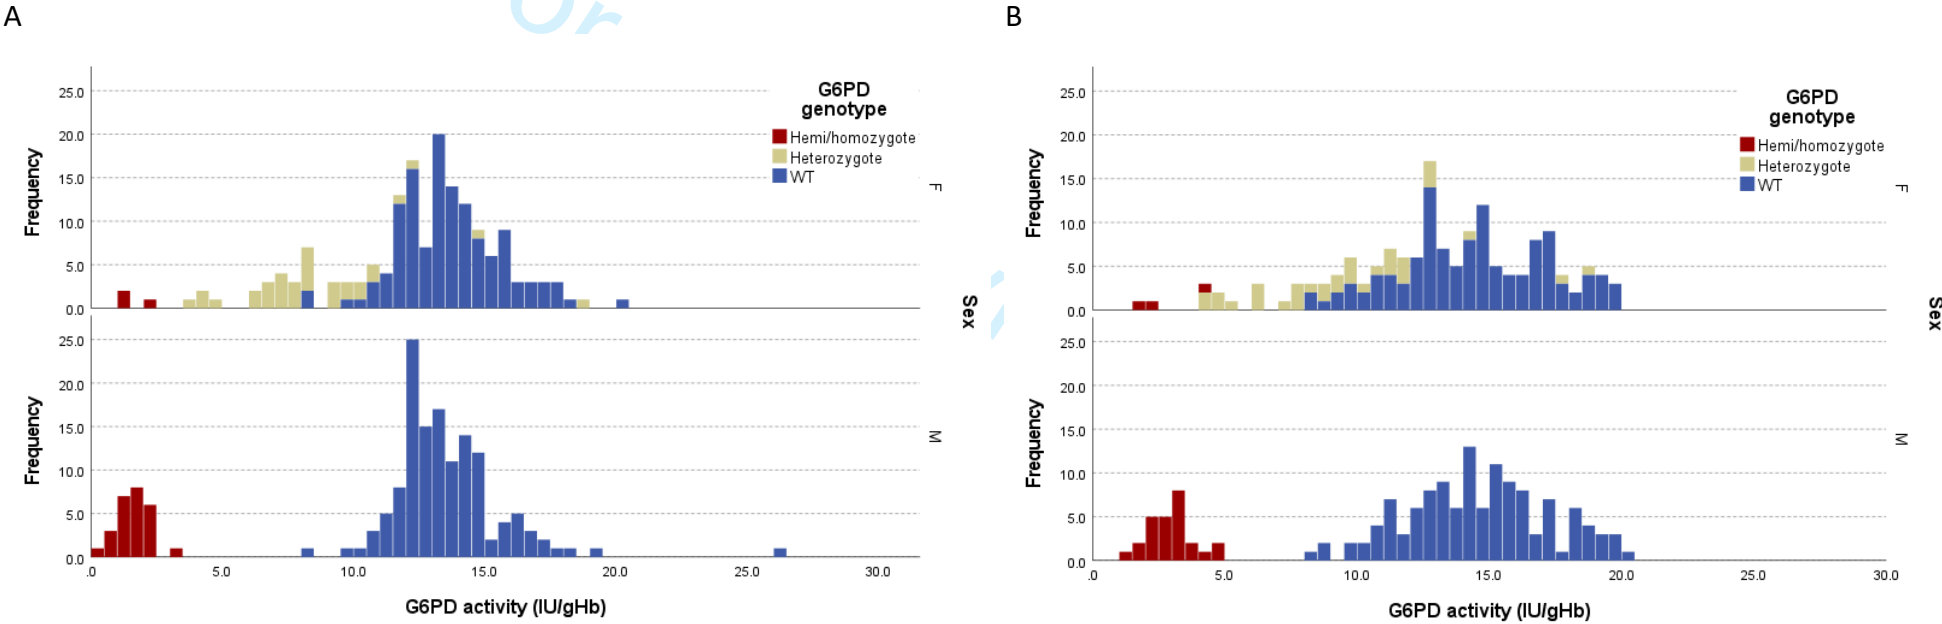

**Figure 2.** Bland Altman plot of G6PD activity (A) and haemoglobin levels (B) in cord blood comparing gold standard spectrophotometry to Biosensor

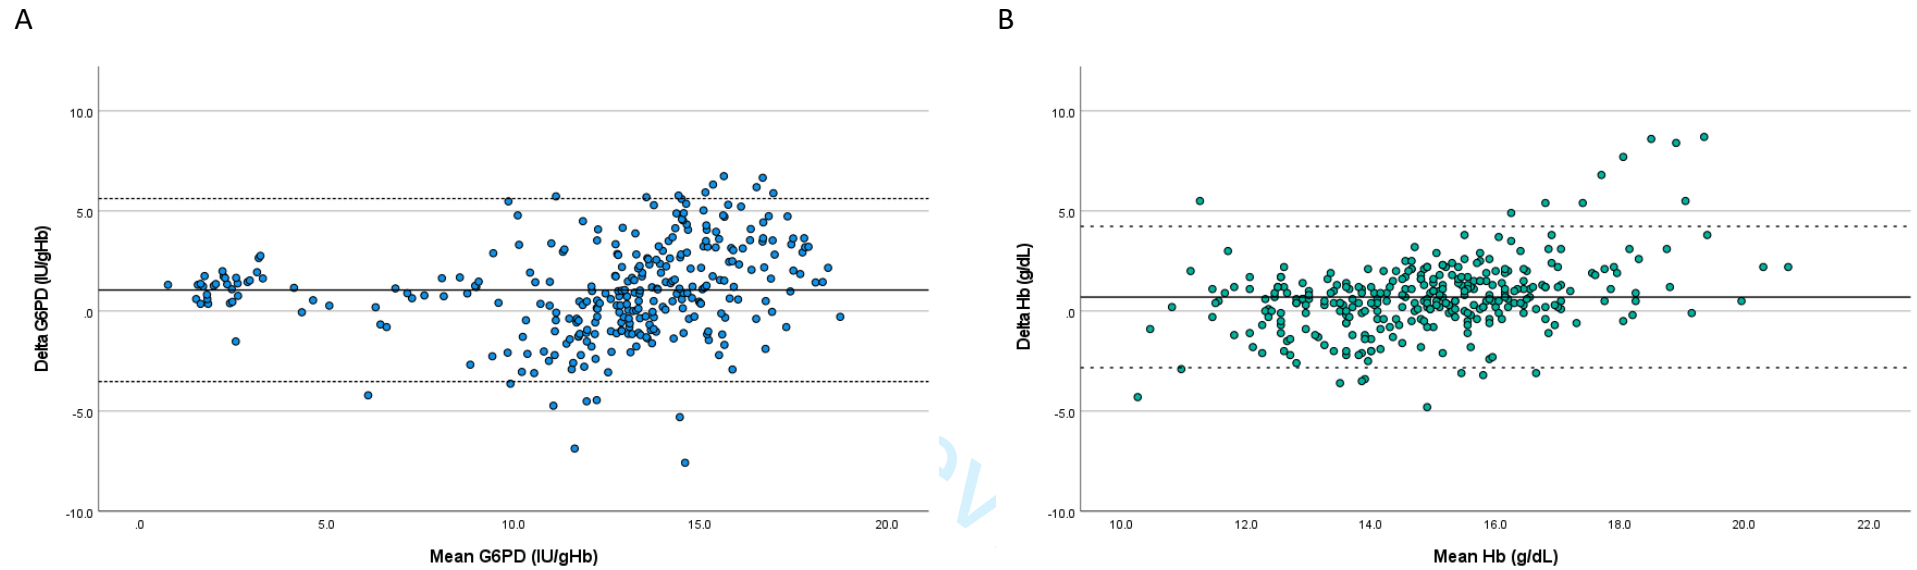

Delta G6PD=G6PD Biosensor- G6PD Spectrophotometry  
 Full horizontal line indicates mean difference (1.05IU/gHb); dotted horizontal lines indicate limits of agreement (-3.52 to 5.62IU/gHb)

Delta Hb=Hb Biosensor- Hb Spectrophotometry  
 Full horizontal line indicates mean difference (0.70g/dL); dotted horizontal lines indicate limits of agreement (-2.83 to 4.23g/dL)

1  
2  
3  
4  
5  
6  
7  
8  
9  
10  
11  
12  
13  
14  
15  
16  
17  
18  
19  
20  
21  
22  
23  
24  
25  
26  
27  
28  
29  
30  
31  
32  
33  
34  
35  
36  
37  
38  
39  
40  
41  
42  
43  
44  
45  
46

**Figure 3.** Receiver Operating Characteristic curve of Biosensor for 30% activity (A) and 70% activity (B) thresholds.

A) 30% activity

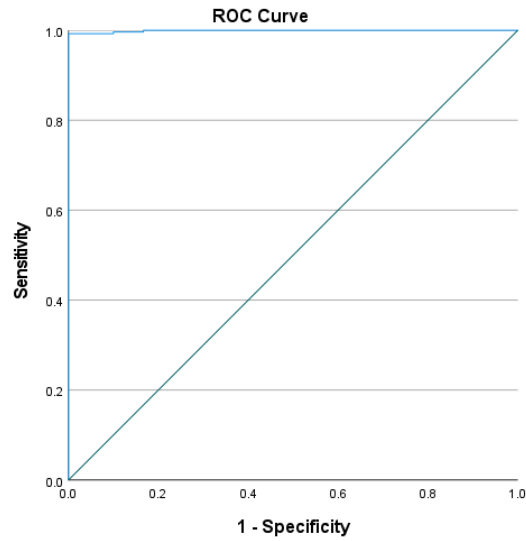

B) 70% activity

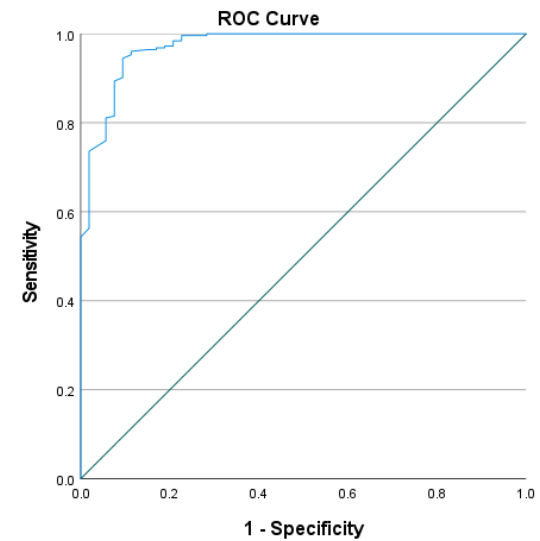

**Quantitative G6PD point-of-care test can be used reliably on cord blood to identify male and female newborns at increased risk of neonatal hyperbilirubinaemia: a mixed method study**

**Supplementary Figures and Tables**

**S Table 1.** G6PD enzymatic activity (IU/gHb) of cord blood by spectrophotometry according to genotype

| G6PD genotype | N   | Mean  | Std. Deviation | Minimum | Maximum |
|---------------|-----|-------|----------------|---------|---------|
| Hemizygote    | 26  | 1.64  | 0.65           | 0.09    | 3.32    |
| Homozygote    | 3   | 1.66  | 0.43           | 1.38    | 2.16    |
| Heterozygote  | 34  | 8.55  | 2.97           | 3.54    | 18.89   |
| WT            | 262 | 13.62 | 2.02           | 8.01    | 26.32   |
| Total         | 325 | 12.02 | 4.14           | 0.09    | 26.32   |

**S Table 2.** G6PD enzymatic activity (IU/gHb) by Biosensor according to genotype

| G6PD genotype | N   | Mean  | Std. Deviation | Minimum | Maximum |
|---------------|-----|-------|----------------|---------|---------|
| Hemizygote    | 26  | 2.87  | 0.81           | 1.4     | 4.6     |
| Homozygote    | 3   | 2.70  | 1.23           | 1.8     | 4.1     |
| Heterozygote  | 34  | 9.50  | 3.47           | 4.0     | 18.6    |
| WT            | 244 | 14.46 | 2.72           | 8.1     | 20.0    |
| Total         | 307 | 12.82 | 4.47           | 1.4     | 20.0    |

**S Figure 1.** Absolute difference in G6PD activity detected by Biosensor as compared to spectrophotometry over time (only MKT clinic)

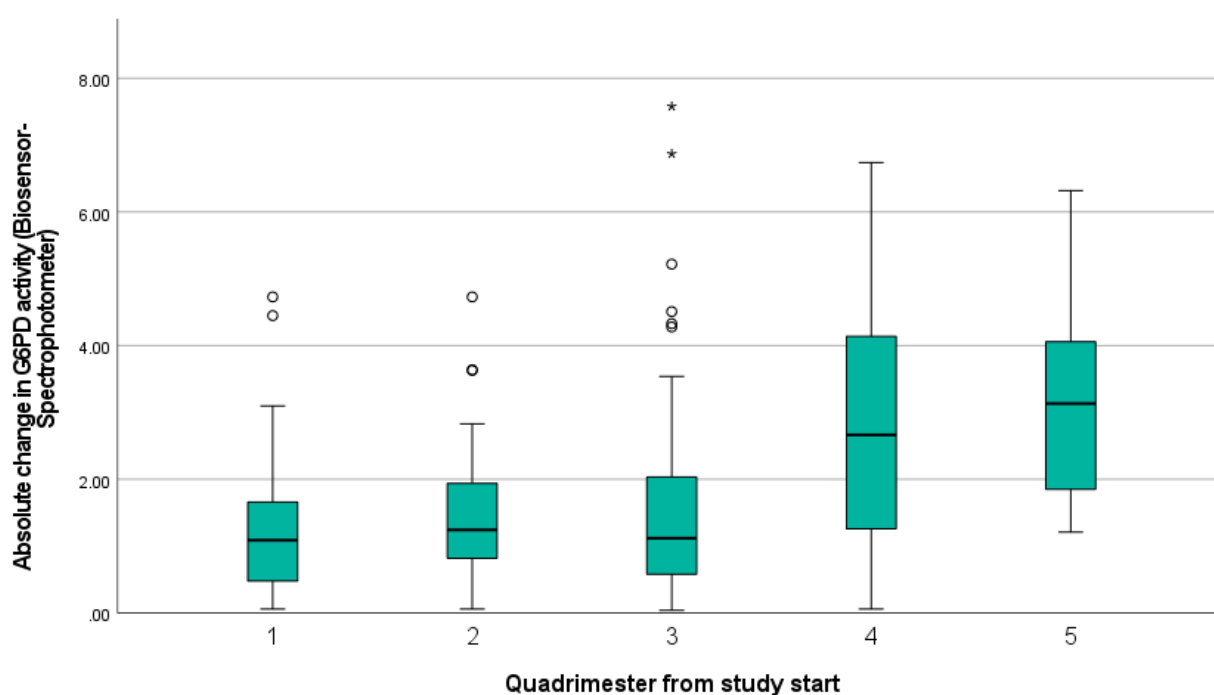

1  
2  
3  
4  
5  
6  
7  
8  
9  
10  
11  
12  
13  
14  
15  
16  
17  
18  
19  
20  
21  
22  
23  
24  
25  
26  
27  
28  
29  
30  
31  
32  
33  
34  
35  
36  
37  
38  
39  
40  
41  
42  
43  
44  
45  
46

**S Table 3.** Characteristics of samples misclassified by Biosensor

| Clinic | Year | EGA | Sex | Reference G6PD (IU/gHb) | Reference Hb (g/dL) | Percent activity of reference (%) | Reference phenotype | Biosensor G6PD (IU/gHb) | Biosensor Hb (g/dL) | Percent activity of Biosensor (%) | Percent activity of reference (%) | Biosensor phenotype | G6PD genotype Mahidol | Retics (%) | WBC (10 <sup>3</sup> / uL) |
|--------|------|-----|-----|-------------------------|---------------------|-----------------------------------|---------------------|-------------------------|---------------------|-----------------------------------|-----------------------------------|---------------------|-----------------------|------------|----------------------------|
| MKT    | 2020 | 42  | F   | 4.4                     | 15                  | 33                                | INT                 | 4.3                     | 15.2                | 30                                | 32                                | DEF                 | Heterozygote          | 1.5        | 13.6                       |
| MKT    | 2021 | 40  | F   | 7.1                     | 15.8                | 54                                | INT                 | 12.6                    | 16.3                | 88                                | 95                                | NOR                 | Heterozygote          | 1.3        | 20.2                       |
| MKT    | 2021 | 41  | F   | 7.7                     | 14.1                | 58                                | INT                 | 12.5                    | 11.5                | 87                                | 94                                | NOR                 | Heterozygote          | ND         | 20.6                       |
| MKT    | 2021 | 39  | F   | 8.0                     | 15.3                | 60                                | INT                 | 10.9                    | 11.7                | 76                                | 82                                | NOR                 | WT                    | 2.3        | 19.3                       |
| MKT    | 2021 | 39  | F   | 8.2                     | 14.3                | 62                                | INT                 | 4                       | 15.7                | 28                                | 30                                | DEF                 | Heterozygote          | 2.2        | 21.1                       |
| MKT    | 2021 | 39  | F   | 8.5                     | 14.1                | 64                                | INT                 | 11.8                    | 14.1                | 82                                | 89                                | NOR                 | Heterozygote          | ND         | ND                         |
| WPA    | 2021 | 39  | F   | 9.4                     | 13.3                | 71                                | NOR                 | 9.8                     | 13.7                | 68                                | 74                                | INT                 | Heterozygote          | 1.6        | 13.8                       |
| WPA    | 2021 | 38  | F   | 10.2                    | 14.8                | 77                                | NOR                 | 7.5                     | 15.3                | 52                                | 56                                | INT                 | Heterozygote          | 2.1        | 11.6                       |
| WPA    | 2021 | 39  | F   | 10.9                    | 15.6                | 82                                | NOR                 | 8.8                     | 16.7                | 61                                | 66                                | INT                 | WT                    | 1.6        | 12.5                       |
| MKT    | 2020 | 38  | F   | 11.4                    | 16.7                | 86                                | NOR                 | 9.3                     | 18.8                | 65                                | 70                                | INT                 | WT                    | 4.8        | 7.1                        |
| WPA    | 2021 | 39  | F   | 11.7                    | 14.3                | 88                                | NOR                 | 8.1                     | 16.5                | 56                                | 61                                | INT                 | WT                    | 1.8        | 11.1                       |
| WPA    | 2020 | 39  | F   | 11.8                    | 15.8                | 89                                | NOR                 | 9.8                     | 15.3                | 68                                | 74                                | INT                 | WT                    | 1.9        | 14.3                       |
| MKT    | 2020 | 39  | F   | 12.1                    | 12.6                | 91                                | NOR                 | 9                       | 13.2                | 63                                | 68                                | INT                 | WT                    | 3.9        | 14.4                       |
| MKT    | 2021 | 40  | F   | 14.2                    | 14                  | 107                               | NOR                 | 9.7                     | 16.3                | 67                                | 73                                | INT                 | WT                    | 1.7        | 11.3                       |
| MKT    | 2021 | 37  | F   | 15.1                    | 11.2                | 113                               | NOR                 | 8.2                     | 12.1                | 57                                | 62                                | INT                 | WT                    | 3.7        | 15.5                       |

**S Table 4.** Phototherapy treatment in newborns with EGA $\geq$ 38 weeks with different G6PD phenotypes

| G6PD phenotype by spectrophotometry | PT | No PT | % PT | RR  | 95%CI    | $P_{Fisher}$ |
|-------------------------------------|----|-------|------|-----|----------|--------------|
| Deficient                           | 8  | 20    | 28.6 | 4.9 | 2.3-10.5 | <0.001       |
| Intermediate                        | 3  | 17    | 15.0 | 2.6 | 0.8-8.1  | 0.13         |
| Normal                              | 15 | 242   | 5.8  |     |          | reference    |
| G6PD phenotype by Biosensor         |    |       |      |     |          |              |
| Deficient                           | 9  | 21    | 30.0 | 5.4 | 2.5-11.6 | <0.001       |
| Intermediate                        | 2  | 20    | 9.1  | 1.7 | 0.4-6.8  | 0.49         |
| Normal                              | 13 | 223   | 5.5  |     |          | reference    |



## Prepare the machine, test device and buffer (step 1-8) BEFORE doing the blood collection (step 9)

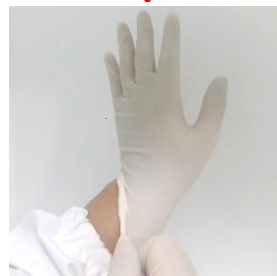

1. Put on gloves

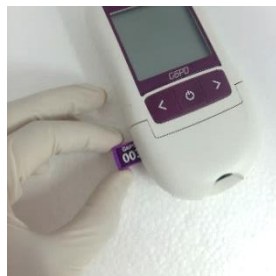

2. Insert codechip (For first time using or open new box of test device)

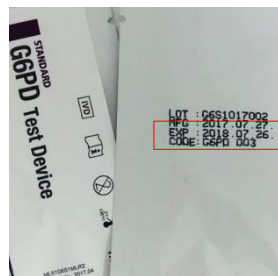

3. Check the expiry date printed on the foil pouch

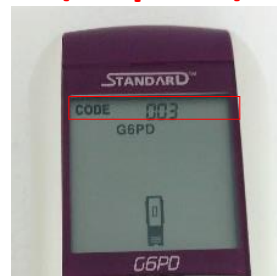

4. Check that codechip number on screen correspond to test device

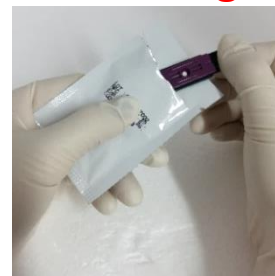

5. Open the foil pouch and take a test device out and hold the test in the right side

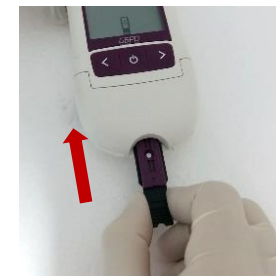

6. Insert the test device

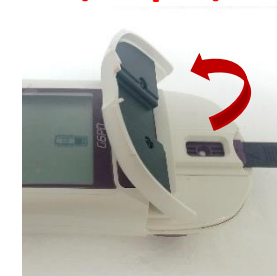

7. Open flap chamber

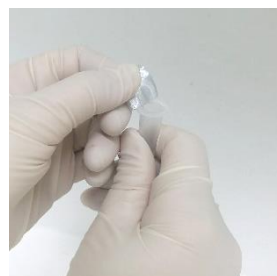

8. Open buffer tube and place on rack

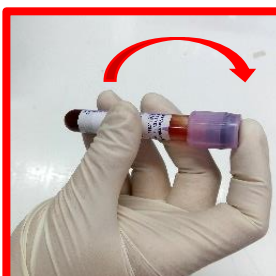9. Mix sample tube well by inverting\* 10 times  
\*Gently, no bubbles and no shaking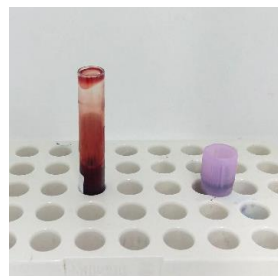

10. Place on rack

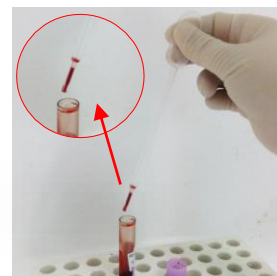

11. Collect blood by using Pasteur pipette

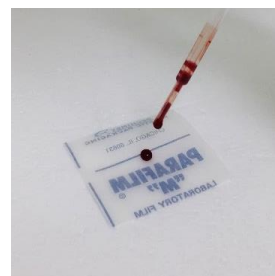

12. Drop blood on para film one drop (Avoid to make bubble)

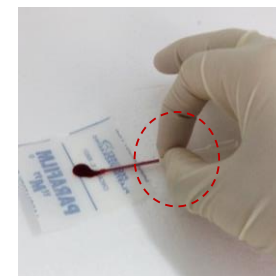

13. Hold the EZI tube horizontally, and touch the tip of the EZI tube to the blood specimen. Do not close hole.

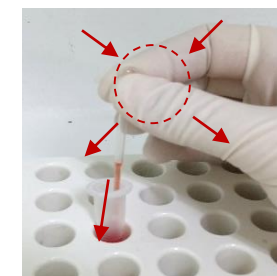

14. Mix the blood specimen with extraction buffer by pressing and releasing the EZI tube 10 times

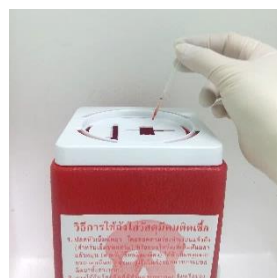

15. Discard used EZI tube in the sharp bin

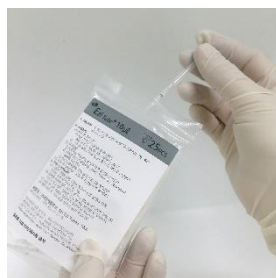

16. Take new EZI tube

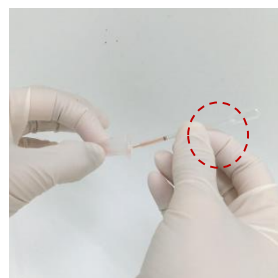

17. Hold the EZI tube horizontally, and touch the tip of the EZI tube to the mixed blood specimen. Do not close hole.

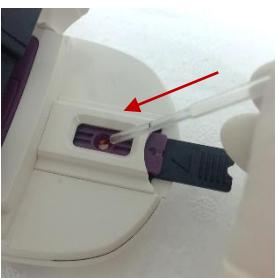

18. Apply mixed specimen to the specimen application hole of the test device

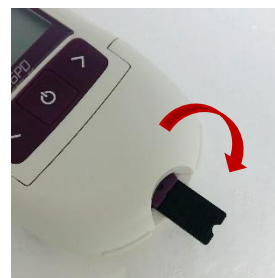

19. Close the flap chamber immediately after applying

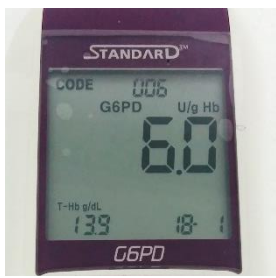

20. Wait for 2 min for the test result to appear on the screen (Check date) and report results on the logbook

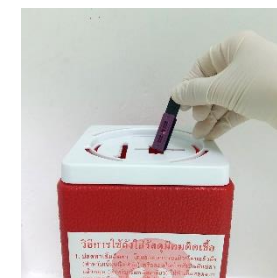

21. Take the used test device out and discard in sharp bin

| Section & Topic          | No  | Item                                                                                                                                                   | Reported on page # |
|--------------------------|-----|--------------------------------------------------------------------------------------------------------------------------------------------------------|--------------------|
| <b>TITLE OR ABSTRACT</b> |     |                                                                                                                                                        |                    |
|                          | 1   | Identification as a study of diagnostic accuracy using at least one measure of accuracy (such as sensitivity, specificity, predictive values, or AUC)  | 2                  |
| <b>ABSTRACT</b>          |     |                                                                                                                                                        |                    |
|                          | 2   | Structured summary of study design, methods, results, and conclusions (for specific guidance, see STARD for Abstracts)                                 | 2                  |
| <b>INTRODUCTION</b>      |     |                                                                                                                                                        |                    |
|                          | 3   | Scientific and clinical background, including the intended use and clinical role of the index test                                                     | 4                  |
|                          | 4   | Study objectives and hypotheses                                                                                                                        | 4                  |
| <b>METHODS</b>           |     |                                                                                                                                                        |                    |
| <i>Study design</i>      | 5   | Whether data collection was planned before the index test and reference standard were performed (prospective study) or after (retrospective study)     | 5                  |
| <i>Participants</i>      | 6   | Eligibility criteria                                                                                                                                   | 5                  |
|                          | 7   | On what basis potentially eligible participants were identified (such as symptoms, results from previous tests, inclusion in registry)                 | 5                  |
|                          | 8   | Where and when potentially eligible participants were identified (setting, location and dates)                                                         | 5                  |
|                          | 9   | Whether participants formed a consecutive, random or convenience series                                                                                | 5                  |
| <i>Test methods</i>      | 10a | Index test, in sufficient detail to allow replication                                                                                                  | 6                  |
|                          | 10b | Reference standard, in sufficient detail to allow replication                                                                                          | 6                  |
|                          | 11  | Rationale for choosing the reference standard (if alternatives exist)                                                                                  | NA                 |
|                          | 12a | Definition of and rationale for test positivity cut-offs or result categories of the index test, distinguishing pre-specified from exploratory         | 8-9                |
|                          | 12b | Definition of and rationale for test positivity cut-offs or result categories of the reference standard, distinguishing pre-specified from exploratory | 8-9                |
|                          | 13a | Whether clinical information and reference standard results were available to the performers/readers of the index test                                 | 5                  |
|                          | 13b | Whether clinical information and index test results were available to the assessors of the reference standard                                          | 5                  |
| <i>Analysis</i>          | 14  | Methods for estimating or comparing measures of diagnostic accuracy                                                                                    | 8-9                |
|                          | 15  | How indeterminate index test or reference standard results were handled                                                                                | 5                  |
|                          | 16  | How missing data on the index test and reference standard were handled                                                                                 | NA                 |
|                          | 17  | Any analyses of variability in diagnostic accuracy, distinguishing pre-specified from exploratory                                                      | NA                 |
|                          | 18  | Intended sample size and how it was determined                                                                                                         | 8                  |
| <b>RESULTS</b>           |     |                                                                                                                                                        |                    |
| <i>Participants</i>      | 19  | Flow of participants, using a diagram                                                                                                                  |                    |
|                          | 20  | Baseline demographic and clinical characteristics of participants                                                                                      | 10                 |
|                          | 21a | Distribution of severity of disease in those with the target condition                                                                                 | 11-12              |
|                          | 21b | Distribution of alternative diagnoses in those without the target condition                                                                            | NA                 |
|                          | 22  | Time interval and any clinical interventions between index test and reference standard                                                                 | NA                 |
| <i>Test results</i>      | 23  | Cross tabulation of the index test results (or their distribution) by the results of the reference standard                                            | table 2            |
|                          | 24  | Estimates of diagnostic accuracy and their precision (such as 95% confidence intervals)                                                                | 11-12              |
|                          | 25  | Any adverse events from performing the index test or the reference standard                                                                            | NA                 |
| <b>DISCUSSION</b>        |     |                                                                                                                                                        |                    |
|                          | 26  | Study limitations, including sources of potential bias, statistical uncertainty, and generalisability                                                  | 16                 |
|                          | 27  | Implications for practice, including the intended use and clinical role of the index test                                                              | 17                 |
| <b>OTHER INFORMATION</b> |     |                                                                                                                                                        |                    |
|                          | 28  | Registration number and name of registry                                                                                                               | NA                 |
|                          | 29  | Where the full study protocol can be accessed                                                                                                          | 10                 |
|                          | 30  | Sources of funding and other support; role of funders                                                                                                  | 9-10               |

# STARD 2015

---

## AIM

STARD stands for “Standards for Reporting Diagnostic accuracy studies”. This list of items was developed to contribute to the completeness and transparency of reporting of diagnostic accuracy studies. Authors can use the list to write informative study reports. Editors and peer-reviewers can use it to evaluate whether the information has been included in manuscripts submitted for publication.

---

## EXPLANATION

A **diagnostic accuracy study** evaluates the ability of one or more medical tests to correctly classify study participants as having a **target condition**. This can be a disease, a disease stage, response or benefit from therapy, or an event or condition in the future. A medical test can be an imaging procedure, a laboratory test, elements from history and physical examination, a combination of these, or any other method for collecting information about the current health status of a patient.

The test whose accuracy is evaluated is called **index test**. A study can evaluate the accuracy of one or more index tests. Evaluating the ability of a medical test to correctly classify patients is typically done by comparing the distribution of the index test results with those of the **reference standard**. The reference standard is the best available method for establishing the presence or absence of the target condition. An accuracy study can rely on one or more reference standards.

If test results are categorized as either positive or negative, the cross tabulation of the index test results against those of the reference standard can be used to estimate the **sensitivity** of the index test (the proportion of participants *with* the target condition who have a positive index test), and its **specificity** (the proportion *without* the target condition who have a negative index test). From this cross tabulation (sometimes referred to as the contingency or “2x2” table), several other accuracy statistics can be estimated, such as the positive and negative **predictive values** of the test. Confidence intervals around estimates of accuracy can then be calculated to quantify the statistical **precision** of the measurements.

If the index test results can take more than two values, categorization of test results as positive or negative requires a **test positivity cut-off**. When multiple such cut-offs can be defined, authors can report a receiver operating characteristic (ROC) curve which graphically represents the combination of sensitivity and specificity for each possible test positivity cut-off. The **area under the ROC curve** informs in a single numerical value about the overall diagnostic accuracy of the index test.

The **intended use** of a medical test can be diagnosis, screening, staging, monitoring, surveillance, prediction or prognosis. The **clinical role** of a test explains its position relative to existing tests in the clinical pathway. A replacement test, for example, replaces an existing test. A triage test is used before an existing test; an add-on test is used after an existing test.

Besides diagnostic accuracy, several other outcomes and statistics may be relevant in the evaluation of medical tests. Medical tests can also be used to classify patients for purposes other than diagnosis, such as staging or prognosis. The STARD list was not explicitly developed for these other outcomes, statistics, and study types, although most STARD items would still apply.

---

## DEVELOPMENT

This STARD list was released in 2015. The 30 items were identified by an international expert group of methodologists, researchers, and editors. The guiding principle in the development of STARD was to select items that, when reported, would help readers to judge the potential for bias in the study, to appraise the applicability of the study findings and the validity of conclusions and recommendations. The list represents an update of the first version, which was published in 2003.

More information can be found on <http://www.equator-network.org/reporting-guidelines/stard>.

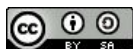

# BMJ Open

## Technical evaluation and usability of a quantitative G6PD POC test in cord blood: a mixed methods study in a low-resource setting

|                               |                                                                                                                                                                                                                                                                                                                                                                                                                                                                                                                                                                                                                                                                                                                                                                                                                                                                                                                                                                                                                                                                                                                                                                                                                                                                                                                                                                                                                                                                                                                                                                                                                                                                                                                                                                                                                                                                                                                                                                                                                                                                                                                                                                                                                                                                                                                                                                                                                                                                                                                                                  |
|-------------------------------|--------------------------------------------------------------------------------------------------------------------------------------------------------------------------------------------------------------------------------------------------------------------------------------------------------------------------------------------------------------------------------------------------------------------------------------------------------------------------------------------------------------------------------------------------------------------------------------------------------------------------------------------------------------------------------------------------------------------------------------------------------------------------------------------------------------------------------------------------------------------------------------------------------------------------------------------------------------------------------------------------------------------------------------------------------------------------------------------------------------------------------------------------------------------------------------------------------------------------------------------------------------------------------------------------------------------------------------------------------------------------------------------------------------------------------------------------------------------------------------------------------------------------------------------------------------------------------------------------------------------------------------------------------------------------------------------------------------------------------------------------------------------------------------------------------------------------------------------------------------------------------------------------------------------------------------------------------------------------------------------------------------------------------------------------------------------------------------------------------------------------------------------------------------------------------------------------------------------------------------------------------------------------------------------------------------------------------------------------------------------------------------------------------------------------------------------------------------------------------------------------------------------------------------------------|
| Journal:                      | <i>BMJ Open</i>                                                                                                                                                                                                                                                                                                                                                                                                                                                                                                                                                                                                                                                                                                                                                                                                                                                                                                                                                                                                                                                                                                                                                                                                                                                                                                                                                                                                                                                                                                                                                                                                                                                                                                                                                                                                                                                                                                                                                                                                                                                                                                                                                                                                                                                                                                                                                                                                                                                                                                                                  |
| Manuscript ID                 | bmjopen-2022-066529.R1                                                                                                                                                                                                                                                                                                                                                                                                                                                                                                                                                                                                                                                                                                                                                                                                                                                                                                                                                                                                                                                                                                                                                                                                                                                                                                                                                                                                                                                                                                                                                                                                                                                                                                                                                                                                                                                                                                                                                                                                                                                                                                                                                                                                                                                                                                                                                                                                                                                                                                                           |
| Article Type:                 | Original research                                                                                                                                                                                                                                                                                                                                                                                                                                                                                                                                                                                                                                                                                                                                                                                                                                                                                                                                                                                                                                                                                                                                                                                                                                                                                                                                                                                                                                                                                                                                                                                                                                                                                                                                                                                                                                                                                                                                                                                                                                                                                                                                                                                                                                                                                                                                                                                                                                                                                                                                |
| Date Submitted by the Author: | 09-Nov-2022                                                                                                                                                                                                                                                                                                                                                                                                                                                                                                                                                                                                                                                                                                                                                                                                                                                                                                                                                                                                                                                                                                                                                                                                                                                                                                                                                                                                                                                                                                                                                                                                                                                                                                                                                                                                                                                                                                                                                                                                                                                                                                                                                                                                                                                                                                                                                                                                                                                                                                                                      |
| Complete List of Authors:     | <p>Bancone, Germana; Shoklo Malaria Research Unit, Mahidol-Oxford Tropical Medicine Research Unit, Faculty of Tropical Medicine, Mahidol University; University of Oxford Centre for Tropical Medicine and Global Health</p> <p>Gilder, Mary Ellen; Shoklo Malaria Research Unit, Mahidol-Oxford Tropical Medicine Research Unit, Faculty of Tropical Medicine, Mahidol University</p> <p>Win, Elsie; Shoklo Malaria Research Unit, Mahidol-Oxford Tropical Medicine Research Unit, Faculty of Tropical Medicine, Mahidol University</p> <p>Gornsawun, Gornpan; Shoklo Malaria Research Unit, Mahidol-Oxford Tropical Medicine Research Unit, Faculty of Tropical Medicine, Mahidol University</p> <p>Penpitchaporn, Penporn; Shoklo Malaria Research Unit, Mahidol-Oxford Tropical Medicine Research Unit, Faculty of Tropical Medicine, Mahidol University</p> <p>Moo, Phaw Khu; Shoklo Malaria Research Unit, Mahidol-Oxford Tropical Medicine Research Unit, Faculty of Tropical Medicine, Mahidol University</p> <p>Archasuksan, Laypaw; Shoklo Malaria Research Unit, Mahidol-Oxford Tropical Medicine Research Unit, Faculty of Tropical Medicine, Mahidol University</p> <p>Wai, Nan San; Shoklo Malaria Research Unit, Mahidol-Oxford Tropical Medicine Research Unit, Faculty of Tropical Medicine, Mahidol University</p> <p>Win, Sylverine; Shoklo Malaria Research Unit, Mahidol-Oxford Tropical Medicine Research Unit, Faculty of Tropical Medicine, Mahidol University</p> <p>Aung, Ko Ko; Shoklo Malaria Research Unit, Mahidol-Oxford Tropical Medicine Research Unit, Faculty of Tropical Medicine, Mahidol University</p> <p>Hashmi, Ahmar; Institute for Implementation Science, University of Texas Health Sciences Center (UTHealth), Houston, TX USA; Department of Health Promotion and Behavioral Sciences, School of Public Health, University of Texas Health Sciences Center (UTHealth)</p> <p>Hanboonkunupakarn, Borimas; Mahidol-Oxford Tropical Medicine Research Unit (MORU), Faculty of Tropical Medicine, Mahidol University</p> <p>Nosten, Francois; Shoklo Malaria Research Unit, Mahidol-Oxford Tropical Medicine Research Unit, Faculty of Tropical Medicine, Mahidol University; University of Oxford Centre for Tropical Medicine and Global Health</p> <p>Carrara, Verena Iona; Shoklo Malaria Research Unit, Mahidol-Oxford Tropical Medicine Research Unit, Faculty of Tropical Medicine, Mahidol University; Institute of Global Health, Faculty of Medicine, University of Geneva, Switzerland</p> |

|                                    |                                                                                                                                                                                                                     |
|------------------------------------|---------------------------------------------------------------------------------------------------------------------------------------------------------------------------------------------------------------------|
|                                    | McGready, Rose; Shoklo Malaria Research Unit, Mahidol-Oxford Tropical Medicine Research Unit, Faculty of Tropical Medicine, Mahidol University; University of Oxford Centre for Tropical Medicine and Global Health |
| <b>Primary Subject Heading</b> :   | Diagnostics                                                                                                                                                                                                         |
| <b>Secondary Subject Heading</b> : | Global health, Haematology (incl blood transfusion), Paediatrics, Patient-centred medicine                                                                                                                          |
| <b>Keywords</b> :                  | PAEDIATRICS, NEONATOLOGY, MOLECULAR BIOLOGY                                                                                                                                                                         |
|                                    |                                                                                                                                                                                                                     |

SCHOLARONE™  
Manuscripts



I, the Submitting Author has the right to grant and does grant on behalf of all authors of the Work (as defined in the below author licence), an exclusive licence and/or a non-exclusive licence for contributions from authors who are: i) UK Crown employees; ii) where BMJ has agreed a CC-BY licence shall apply, and/or iii) in accordance with the terms applicable for US Federal Government officers or employees acting as part of their official duties; on a worldwide, perpetual, irrevocable, royalty-free basis to BMJ Publishing Group Ltd ("BMJ") its licensees and where the relevant Journal is co-owned by BMJ to the co-owners of the Journal, to publish the Work in this journal and any other BMJ products and to exploit all rights, as set out in our [licence](#).

The Submitting Author accepts and understands that any supply made under these terms is made by BMJ to the Submitting Author unless you are acting as an employee on behalf of your employer or a postgraduate student of an affiliated institution which is paying any applicable article publishing charge ("APC") for Open Access articles. Where the Submitting Author wishes to make the Work available on an Open Access basis (and intends to pay the relevant APC), the terms of reuse of such Open Access shall be governed by a Creative Commons licence – details of these licences and which [Creative Commons](#) licence will apply to this Work are set out in our licence referred to above.

Other than as permitted in any relevant BMJ Author's Self Archiving Policies, I confirm this Work has not been accepted for publication elsewhere, is not being considered for publication elsewhere and does not duplicate material already published. I confirm all authors consent to publication of this Work and authorise the granting of this licence.

1  
2  
3  
4  
5 1 TITLE6 2 **Technical evaluation and usability of a quantitative G6PD POC test in cord blood: a mixed methods**  
7 3 **study in a low-resource setting**  
8  
910 4  
11 5 Germana Bancone<sup>1,2,\*</sup>, Mary Ellen Gilder<sup>1</sup>, Elsie Win<sup>1</sup>, Gornpan Gornsawun<sup>1</sup>, Penporn Penpitchaporn<sup>1</sup>,  
12 6 Paw Khu Moo<sup>1</sup>, Laypaw Archasuksan<sup>1</sup>, Nan San Wai<sup>1</sup>, Sylverine Win<sup>1</sup>, Ko Ko Aung<sup>1</sup>, Ahmar Hashmi<sup>4,5</sup>,  
13 7 Borimas Hanboonkunupakarn<sup>3</sup>, Francois Nosten<sup>1,2</sup>, Verena I Carrara<sup>1,6</sup>, Rose McGready<sup>1,2</sup>  
14 815  
16 9 1. Shoklo Malaria Research Unit, Mahidol-Oxford Tropical Medicine Research Unit, Faculty of Tropical  
17 10 Medicine, Mahidol University, Mae Sot, Thailand.18  
19 11 2. Centre for Tropical Medicine and Global Health, Nuffield Department of Medicine, University of  
20 12 Oxford, Oxford, United Kingdom.21  
22 13 3. Mahidol-Oxford Tropical Medicine Research Unit (MORU), Faculty of Tropical Medicine, Mahidol  
23 14 University, Bangkok, Thailand.24  
25 15 4. Institute for Implementation Science, University of Texas Health Sciences Center (UTHealth),  
26 16 Houston, TX USA27  
28 17 5. Department of Health Promotion and Behavioral Sciences, School of Public Health, University of  
29 18 Texas Health Sciences Center (UTHealth) Houston, TX USA30  
31 19 6. Institute of Global Health, Faculty of Medicine, University of Geneva, Switzerland32  
33 20 \* corresponding author: [germana@tropmedres.ac](mailto:germana@tropmedres.ac)  
34  
35  
36  
37  
38  
39  
40  
41  
42  
43  
44  
45  
46  
47  
48  
49

## 50 26 ABSTRACT

51  
52  
53 27 Objectives: New point-of-care (POC) quantitative G6PD testing devices developed to provide safe  
54 28 radical cure for *P. vivax* malaria may be used to diagnose G6PD deficiency in newborns at risk of severe  
55 29 neonatal hyperbilirubinaemia, improving clinical care, and preventing related morbidity and mortality.  
56  
57  
58  
59  
60

1  
2  
3 30 Methods: We conducted a mixed-methods study analyzing technical performance and usability of the  
4  
5 31 “STANDARD G6PD” Biosensor when used by trained midwives on cord blood samples at two rural  
6  
7 32 clinics on the Thailand-Myanmar border.  
8

9  
10 33 Results: In 307 cord blood samples, the Biosensor had a sensitivity of 1.000 (95%CI 0.859-1.000) and a  
11  
12 34 specificity of 0.993 (95% CI 0.971-0.999) as compared to gold standard spectrophotometry to diagnose  
13  
14 35 G6PD deficient newborns using a receiving operator characteristic (ROC) analysis-derived threshold of  
15  
16 36  $\leq 4.8$  IU/gHb. The Biosensor had a sensitivity of 0.727 (95%CI: 0.498-0.893) and specificity of 0.933  
17  
18 37 (95%CI: 0.876-0.969) for 30-70% activity range in females using ROC analysis-derived range of 4.9 to  
19  
20 38 9.9 IU/gHb. These thresholds allowed identification of all G6PD deficient neonates and 80% of female  
21  
22 39 neonates with intermediate phenotypes.  
23

24  
25 40 Need of phototherapy treatment for neonatal hyperbilirubinaemia was higher in neonates with  
26  
27 41 deficient and intermediate phenotypes as diagnosed by either reference spectrophotometry or  
28  
29 42 Biosensor.  
30

31  
32 43 Focus group discussions found high levels of learnability, willingness, satisfaction, and suitability for  
33  
34 44 the Biosensor in this setting. The staff valued the capacity of the Biosensor to identify newborns with  
35  
36 45 G6PD deficiency early (“We can know that early, we can counsel the parents about the chances of their  
37  
38 46 children getting jaundice”) and at the POC, including in more rural settings (“Because we can know the  
39  
40 47 right result of the G6PD deficiency in a short time. Especially for the clinic which does not have a lab”).  
41

42  
43 48 Conclusions: The Biosensor is a suitable tool in this resource-constrained setting to identify newborns  
44  
45 49 with abnormal G6PD phenotypes at increased risk of neonatal hyperbilirubinaemia.  
46  
47

48  
49  
50

## 51 Strengths and limitations of this study

- 52  
53 52 • The technical performance of the G6PD quantitative point-of-care diagnostic device was  
54  
55 53 assessed against the current gold-standard spectrophotometric assay.  
56  
57 54 • Receiving operator characteristic analysis was used to identify the best diagnostic thresholds.  
58  
59  
60



- 1  
2  
3 55 • Usability among clinical personnel from a resource-constrained setting was analysed using a  
4  
5 56 conceptual framework developed for similar settings.  
6  
7 57 • Fewer than planned focus group discussions were conducted and they occurred in a single  
8  
9 58 clinical site providing a possibly narrower point of view on the usability topics explored.  
10  
11  
12

## 13 14 59 INTRODUCTION

15  
16 60 Pathologically increased levels of bilirubin during the first week of life, i.e. neonatal  
17  
18 61 hyperbilirubinaemia (NH), are common and dangerous for the developing brain. The most severe form  
19  
20 62 of NH, kernicterus, causes neurological sequelae in >80% of neonates (56/100,000 live births globally,  
21  
22 63 [1]). Every year, an estimated twenty-four million newborns are at risk of NH-related adverse outcomes  
23  
24 64 with three-quarters of mortality occurring in sub-Saharan Africa and South Asia [1,2]. These  
25  
26 65 preventable deaths and disabilities disproportionately affect neonates where universal health care and  
27  
28 66 treatment options are scarce, if not absent [3].  
29  
30 67 Several genetic and clinical factors influence the timing and evolution of NH, including G6PD deficiency,  
31  
32 68 ABO blood group incompatibility, prematurity/low birth weight and sepsis [4]. Early identification of  
33  
34 69 these risk factors can dramatically improve neonatal clinical management during the first days of life  
35  
36 70 [5].  
37  
38  
39  
40  
41

42 71 The enzymatic defect of G6PD deficiency, caused by mutations on the X-linked G6PD gene, is a known  
43  
44 72 risk factor for increased levels of bilirubin after birth and it is associated with susceptibility to drug-  
45  
46 73 induced haemolysis [6]. Risk of severe NH is increased in both deficient and heterozygous newborns  
47  
48 74 with abnormal phenotypes [7-9] and universal neonatal screening of G6PD deficiency is supported by  
49  
50 75 WHO in populations where more than 3-5% of males are affected [10].  
51  
52

53 76 G6PD deficiency is particularly prevalent among neonates from tropical regions [11], where clinical  
54  
55 77 care is often provided in a non-tertiary hospital or clinic context. Knowledge of G6PD status by medical  
56  
57  
58  
59  
60

1  
2  
3 78 staff and parents can aid in avoiding potentially haemolytic antibiotics or other agents (such as  
4  
5 79 naphthalene), improved follow-up, and heightened awareness of signs and symptoms of severe NH.  
6  
7  
8 80 G6PD deficiency is very common among the Karen and Burman population along the Thailand-  
9  
10 81 Myanmar border (9-18% in males, [12]) where it is associated with an increased risk to develop NH  
11  
12 82 requiring phototherapy both in G6PD deficient (over 4-fold [13]) and in heterozygous females (over 2-  
13  
14 83 fold [5]) as compared to wild type genotype neonates. In a recent study, screening of G6PD by  
15  
16 84 qualitative Fluorescent Spot Test (FST) on cord blood failed to identify almost 10% of G6PD deficient  
17  
18 85 neonates [14].  
19  
20  
21  
22 86 Demonstrating usability of new quantitative Point-Of-Care (POC) G6PD diagnostic tests by locally  
23  
24 87 trained clinical staff can inform clinical deployment in this setting and in other rural settings. This study  
25  
26 88 assessed the technical performance and usability of the “G6PD STANDARD” (SD Biosensor, Korea) test  
27  
28 89 when used by trained midwives in two clinics along the Thailand-Myanmar border.  
29  
30  
31  
32

## 33 90 MATERIALS AND METHODS

### 34 91 Study design

35 92 A mixed-methods study was conducted to evaluate both the technical performance of the “G6PD  
36  
37 93 STANDARD” (SD Biosensor, Korea) test (henceforth “Biosensor”) and its usability by midwives in a non-  
38  
39 94 tertiary setting. G6PD enzymatic activity and haemoglobin concentration measured by the device were  
40  
41 95 compared to the gold standard reference spectrophotometric assay and haematology analyser,  
42  
43 96 respectively. Performance of the G6PD fluorescent spot test (FST) currently used routinely at the point-  
44  
45 97 of-care, was also compared to the reference and new test.  
46  
47  
48  
49

50 98 Following local staff training, user proficiency was assessed before study start; usability was explored  
51  
52 99 using focus group discussions (FGD) at the end of the study.  
53  
54  
55  
56  
57  
58  
59  
60

## 100 Study setting and population

101 The study was conducted in SMRU clinics situated along the Thailand-Myanmar border in Tak province  
102 (Thailand) where free antenatal care and birthing services are provided for migrant women of  
103 predominantly Karen and Burman ethnicity.

104 SMRU midwives come from the same population as the pregnant women and patients seeking care at  
105 SMRU clinics. The majority of midwives have primary or secondary education and receive clinical  
106 training on-site. Pregnant women attending SMRU clinics at Wang Pha (WPA) and Maw Ker Thai (MKT)  
107 were informed about the study at regular antenatal care visits in the 3<sup>rd</sup> trimester. Informed consent  
108 procedures and eligibility assessments for mothers were completed before labour commenced.

109 Eligibility of neonates was assessed immediately after delivery, and those born at an estimated  
110 gestational age (EGA) by ultrasound  $\geq 35$  weeks with no severe maternal complications at delivery and  
111 no severe neonatal illness were included. In order to allow laboratory analyses to be performed within  
112 30 hours from collection, only neonates born during week days were included. For all neonates,  
113 indication for starting phototherapy treatment followed the recommendations of the UK NICE  
114 guidelines [15].

## 115 Blood analyses for technical evaluation of Biosensor

116 Two milliliters of cord blood were collected into EDTA from the umbilical cord using an established  
117 SMRU SOP. An aliquot of anticoagulated blood was used by the midwives in the delivery room for the  
118 Biosensor following manufacturer's instructions within one hour of collection (Supplementary file 1).

119 Tests were repeated if the test result was an error or "HI" (a result obtained when G6PD activity is very  
120 high, outside the instrument analytic range). High-level and low-level Biosensor controls were run  
121 weekly or monthly (depending on availability) from April 2020 until May 2021.

122 An aliquot of anticoagulated blood was analysed by G6PD fluorescent spot test (FST) at the clinical  
123 laboratory. The remaining blood was stored at 4°C until shipment to the central SMRU laboratory on  
124 the same day.

1  
2  
3 125 Gold standard reference testing for G6PD and haemoglobin were performed by spectrophotometric  
4  
5 126 assay and haematology analyser (with complete blood and reticulocyte counts), respectively, at the  
6  
7 127 SMRU central laboratory.

9  
10 128 G6PD spectrophotometric assay was performed using Pointe Scientific kits (assay kit # G7583-180, Lysis  
11  
12 129 Buffer # G7583-LysSB). Kinetic determination of G6PD activity at 340 nm was performed using a  
13  
14 130 SHIMAZU UV-1800 spectrophotometer with temperature controlled cuvette compartment (30°C).  
15  
16 131 Samples were analysed in double and mean activity was expressed in IU/gHb using the Hb  
17  
18 132 concentration obtained by complete blood count analysis. The final result was calculated using  
19  
20 133 manufacturer's Temperature Control Factor of 1.37. Two controls (Normal, Intermediate or Deficient;  
21  
22 134 Analytic Control Systems, Inc. USA) were analysed at every run and results compared to expected  
23  
24 135 ranges provided by manufacturer. Complete blood count was performed using a CeltacF MEK-8222K  
25  
26 136 haematology analyser (Nihon Kohden, Japan). Three-levels quality controls were run every day and  
27  
28 137 device maintenance and calibration were performed regularly. Reticulocytes were analysed by  
29  
30 138 microscopy after staining with supervital staining Crystal Violet.

31  
32  
33  
34 139 Buffy coat recovered from whole blood after centrifugation was stored at -20°C for later DNA  
35  
36 140 extraction using standard columns kit (Favorgen Biotech, Taiwan). Genotyping for G6PD common  
37  
38 141 mutations was performed through established SOPs [16]. Mahidol mutation was analysed in all  
39  
40 142 samples. Other mutations were only analysed in phenotypically deficient or intermediate samples  
41  
42 143 (G6PD < 9.31IU/gHb by reference test) with wild type or heterozygote Mahidol genotypes. Viangchan,  
43  
44 144 Chinese-4, Kaiping, Canton, Union and Mediterranean were analysed first and full gene sequence was  
45  
46 145 performed if none of these mutations were found.

47  
48  
49  
50 146

### 51 52 53 147 **Biosensor training, user proficiency and usability assessment**

54 148 Midwives of WPA and MKT SMRU clinics were trained for use of Biosensor and were eligible to  
55  
56 149 participate in the usability component of the study following informed consent. Two to four training  
57  
58 150 sessions were provided at each clinic in the local language by an experienced laboratory technician  
59  
60

1  
2  
3 151 (author LA). The sessions lasted from 1 to 2 hours and included a short introduction about the test, a  
4  
5 152 practical demonstration using imitation blood, and supervised use of the biosensor by each midwife.  
6  
7 153 Midwives were allowed to practice the procedure the week following the training prior to taking a user  
8  
9 154 proficiency test. The proficiency test was administered by author LA in the local language and it  
10  
11 155 consisted of a questionnaire (modified from a questionnaire developed by PATH  
12  
13 156 ([https://www.finddx.org/wp-content/uploads/2020/09/PATH\\_STANDARD-G6PD-User-Competency-](https://www.finddx.org/wp-content/uploads/2020/09/PATH_STANDARD-G6PD-User-Competency-Assessment-quiz_08oct19.pdf)  
14  
15 157 [Assessment-quiz\\_08oct19.pdf](https://www.finddx.org/wp-content/uploads/2020/09/PATH_STANDARD-G6PD-User-Competency-Assessment-quiz_08oct19.pdf)) and direct observation of two consecutive tests. Midwives were asked  
16  
17 158 to explain out-loud their actions while performing the first test. The proficiency test was analysed by  
18  
19 159 authors GB and GG and midwives who scored <85% were re-trained before study start. A visual aid  
20  
21 160 with all critical steps of the procedure was printed and available in the delivery room during the study.  
22  
23 161 The usability component of the study followed the conceptual framework for acceptance and use of a  
24  
25 162 rapid diagnostic test for malaria proposed by Asimwe et al. [17] that evaluates 6 components:  
26  
27 163 learnability, willingness, suitability, satisfaction, efficacy, and effectiveness. The focus group  
28  
29 164 discussions (FGD) specifically focused on 4 main themes of learnability, willingness, satisfaction, and  
30  
31 165 suitability. Due to COVID, only two of the planned six total FGD were conducted. The midwives were  
32  
33 166 grouped by their seniority, with senior and junior midwives together, and midwife assistants in a  
34  
35 167 separate group in order to encourage honest and open conversation. One researcher (KKA) facilitated  
36  
37 168 the FGD while an experienced assistant took notes; both were fluent in Burmese and Karen languages  
38  
39 169 used in the FGD. Immediately following the FGD, research staff debriefed and noted main themes of  
40  
41 170 the discussion. FGDs were audio-recorded and subsequently translated and transcribed in English. Two  
42  
43 171 researchers (MG and GB) independently analysed the transcript using thematic analysis based on the  
44  
45 172 pre-set framework [17] using Taguette (a free and open access qualitative data analysis software,  
46  
47 173 <https://joss.theoj.org/papers/10.21105/joss.03522>) and confirmed findings with KKA. Face-to-face  
48  
49 174 meeting and exchange of notes allowed for triangulation between the researchers.  
50  
51  
52  
53  
54  
55  
56  
57  
58  
59  
60

## 175 Blood analysis for assessment of neonatal hyperbilirubinaemia

176 Routine clinical care for newborns included at least one total serum bilirubin (TSB) test before  
177 discharge (around 48h of life) using capillary blood measured on-site by the rapid quantitative  
178 bilirubinometer BR-501 (Apel Co. Ltd, Japan).

179

## 180 Sample size and statistical analyses

181 The expected prevalence of G6PD deficiency in the population living at the border is 9-18% in males  
182 and 2-4% in female [12, 16] corresponding to approximately 20-30% heterozygous females, 60% of  
183 whom have intermediate activity [18]. Assuming that the proportion of females and males in the  
184 neonate population is 50%, 9% were expected to be G6PD deficient and 7% to be G6PD intermediate.  
185 In order to obtain 95% CI of the limits of agreement within 0.5 SD of the difference, about 31 neonates  
186 with deficiency and 25 with intermediate phenotypes were needed, with a minimum total sample size  
187 of 350 samples.

188 Clinical data were double entered in MACRO and collated with laboratory data; data were analysed  
189 using SPSSv27.

190 Male median (MM) was calculated in all males with wild type genotypes in both the references  
191 spectrophotometric assay and the Biosensor. Deficiency was defined as enzymatic activity below 30%  
192 of MM by reference spectrophotometry and receiving operator characteristic (ROC)-derived 30%  
193 threshold by Biosensor; intermediate phenotypes were defined as enzymatic activity between 30%  
194 and 70% of the MM or ROC-derived threshold.

195 Mean and standard deviation (SD) were reported for continuous variables. Categorical variables were  
196 compared by Chi-squared test and ANOVA. Bland-Altman plot was used to inspect correspondence  
197 between G6PD activity detected by Biosensor compared to the spectrophotometry assay [19].  
198 Correlation was assessed using Pearson's coefficient of correlation and Interclass Correlation  
199 Coefficient (ICC). Area under the curve (AUC) of the ROC curve [20] was calculated at different activity  
200 thresholds to analyse clinical performances (i.e. sensitivity and specificity) of the Biosensor. Cohen's

1  
2  
3 201 Kappa coefficient was calculated for categories of phenotypes identified by Biosensor and  
4  
5 202 spectrophotometry.

6  
7 203 For analysis of haematologic features and risk of neonatal hyperbilirubinaemia, neonates gestational  
8  
9 204 ages assessed by ultrasound were categorized as  $\leq 38$  and  $>38$  weeks according to epidemiologic  
10  
11 205 studies conducted previously in the same population [21].

12  
13  
14 206 Statistical significance was assessed at the 5% level.

### 17 207 **Patient and Public Involvement statement**

18 208 At the outset of the study, the research team engaged the local population through a local ethics and  
19  
20 209 research advisory committee, the Tak Province Community Advisory Board, Thailand. This group is  
21  
22 210 comprised of community leaders who were asked to advise on study design, process, and outcomes of  
23  
24 211 interest, and subsequently approved the study (TCAB201904).

## 29 212 **RESULTS**

30  
31  
32 213 A total of 331 cord blood samples were collected between April 2020 and November 2021; six were  
33  
34 214 clotted and excluded from all analysis. Of the remaining 325 samples, 257 (79%) were collected in MKT  
35  
36 215 clinic and 68 in WPA clinic, in 166 (51%) female and 159 male neonates. Mean (SD) of estimated  
37  
38 216 gestational age of newborns was 39.1 (1.0) weeks.

### 41 217 **General haematologic characteristics**

42 218 As expected for this specimen, haematological characteristics of cord blood (Table 1) showed higher  
43  
44 219 white blood cell count, haemoglobin concentrations, reticulocyte counts and larger cellular volumes  
45  
46 220 compared to adult blood. Reticulocyte counts and red cell distribution width were higher in neonates  
47  
48 221  $<38$  weeks gestational age ( $P=0.02$  and  $P=0.01$  respectively) while the other indexes did not differ by  
49  
50 222 gestational age groups.

51  
52  
53 223

54  
55  
56 224

225 **Table 1.** Haematologic characteristics of cord blood samples according to newborn gestational age. Results are shown as mean (SD)

| EGA (weeks)               | N*  | WBC (10 <sup>3</sup> / uL) | NEU (10 <sup>3</sup> / uL) | LYM (10 <sup>3</sup> / uL) | RBC (10 <sup>6</sup> / uL) | HGB (g/dL)    | HCT (%)       | MCV (fL)       | MCH (pg)      | MCHC (g/dL)   | RDW (%)       | PLT (10 <sup>3</sup> / uL) | Reticulocyte (%) |
|---------------------------|-----|----------------------------|----------------------------|----------------------------|----------------------------|---------------|---------------|----------------|---------------|---------------|---------------|----------------------------|------------------|
| <38                       | 19  | 13.1<br>(3.6)              | 9.6<br>(3.3)               | 2.7<br>(1.7)               | 4.3<br>(0.4)               | 14.4<br>(1.7) | 48.0<br>(5.4) | 110.9<br>(6.6) | 33.2<br>(2.7) | 29.9<br>(1.5) | 16.8<br>(1.5) | 259.2<br>(66.2)            | 2.8<br>(1.8)     |
| ≥38                       | 298 | 14.3<br>(3.8)              | 10.8<br>(3.6)              | 2.8<br>(1.6)               | 4.5<br>(0.5)               | 14.5<br>(1.7) | 49.0<br>(5.2) | 109.0<br>(7.9) | 32.3<br>(3.0) | 29.6<br>(1.4) | 16.0<br>(1.2) | 261.4<br>(47.7)            | 2.1<br>(1.1)     |
| <i>P</i> <sub>ANOVA</sub> |     | 0.17                       | 0.16                       | 0.88                       | 0.14                       | 0.68          | 0.43          | 0.30           | 0.21          | 0.41          | 0.01          | 0.85                       | 0.02             |

226

227 \* Number of samples analysed by haematology analyser was 317 out of 325; 7 samples were analysed by Hemocue and result used to calculate G6PD  
 228 enzymatic activity.

229



## 230 G6PD genotypes

231 A total of 26 hemizygous mutated males (21 Mahidol, 2 Kaiping, 1 Viangchan, 1 Coimbra, 1 Orissa), 3  
232 homozygous mutated females (Mahidol), 34 heterozygous females (32 Mahidol, 1 Canton, 1  
233 Viangchan) and 262 wild type (129 females and 133 males) were found. Overall allelic frequency of all  
234 mutated alleles was 13.4%. The distribution of G6PD activity by spectrophotometry and biosensor  
235 associated with different genotypes are shown in Figures 1 and Supplementary Tables 1 and 2.

## 236 Fluorescent spot test

237 The poor performances of the FST in cord blood were confirmed here, with the FST failing to identify  
238 23% (7/30) of deficient neonates and 100% of the intermediate females (22/22; Table 2).

## 239 Technical evaluation of Biosensor

### 240 Male medians by reference spectrophotometric assay and Biosensor

241 MM G6PD activity by spectrophotometer was 13.3 IU/gHb giving a 30% threshold of 4.0 IU/gHb for  
242 diagnosis of deficiency; intermediate activity (30-70%) in females ranged between 4.1 and 9.3 IU/gHb.  
243 The cord blood-specific 30% spectrophotometric threshold identified all the hemizygous male and  
244 homozygous female newborns (Figure 1A).

245 MM of G6PD activity by Biosensor calculated on 307 samples was 14.4 IU/gHb giving a 30% threshold  
246 of 4.3 IU/gHb for diagnosis of deficiency. Intermediate activity (30-70%) in females ranged between  
247 4.4 and 10.1 IU/gHb (Figure 1B).

248 In 7% of cases (23/325), the Biosensor provided an initial result of "HI" activity without a numeric value.  
249 Of the 19 samples retested, 14 had "HI" results again and 5 samples had an activity ranging from 17.3  
250 to 20.0 IU/gHb; all samples with initial or confirmed "HI" results were normal by spectrophotometry  
251 and had a wild type genotype. Overall, 18 samples (5.5% of the total) did not have a final numeric  
252 result by Biosensor but would have been considered "normal", according to the spectrophotometric  
253 assay.

## 254 Biosensor performance

255 Biosensor performance was assessed for 307/325 samples that yielded numeric results. The mean  
256 ( $\pm 1.96SD$ ) difference in enzymatic activity between Biosensor and spectrophotometry was 1.05 IU/gHb  
257 (LoA: -3.52 to 5.62 IU/gHb) as represented in the Bland-Altman plot in Figure 2A. A very strong  
258 correlation between enzymatic activity by Biosensor and reference spectrophotometry was observed  
259 (Pearson's  $r=0.855$ ,  $p<0.001$ ; ICC=0.905,  $p<0.001$ ).

260 The mean ( $\pm 1.96SD$ ) difference in Hb between the Biosensor and haematology analyser was 0.70 g/dL  
261 (LoA: -2.83 to 4.23 g/dL) (Figure 2B). A moderate correlation between Hb levels by Biosensor and  
262 haematology analyser was observed (Pearson's  $r=0.637$ ,  $p<0.001$ ; ICC=0.728,  $p<0.001$ ).

263 Area under the curve (AUC) of the ROC analysis (Figure 3A) of the 30% threshold was 0.999 (95%CI:  
264 0.997-1.000); ROC analysis showed that 30% of Biosensor MM (4.3IU/gHb) was associated with  
265 sensitivity of 0.931 (95%CI: 0.758-0.988) and specificity of 0.989 (95%CI: 0.966-0.997) while a threshold  
266 of 4.8IU/gHb had a sensitivity of 1.000 (95%CI: 0.859-1.000) and a specificity of 0.993 (95% CI: 0.971-  
267 0.999). This second threshold was therefore used for the subsequent analyses.

268 AUC of the ROC analysis (Figure 3B) for the 70% threshold was 0.972 (95%CI: 0.949-0.994) and ROC  
269 analysis showed that a threshold of 9.9IU/gHb had a better sensitivity and specificity as compared to  
270 the 70% of Biosensor MM (10.1 IU/gHb). The ROC-derived threshold had a sensitivity of 0.842 (95%CI:  
271 0.716-0.921) and specificity of 0.984 (95%CI: 0.957-0.995) to identify samples with  $\leq 70\%$  activity and  
272 was used for subsequent analyses.

273 AUC of the ROC analysis for the range 30-70% activity was 0.935 (95%CI: 0.887-0.983); sensitivity and  
274 specificity for intermediate phenotypes in females were 0.727 (95%CI 0.498-0.893) and 0.933 (95%CI:  
275 0.876-0.969) respectively based on ROC-derived thresholds as compared to 0.592 (95%CI: 0.390-0.770)  
276 and 0.953 (95%CI: 0.897-0.980) using Biosensor MM thresholds.

277 When comparing phenotypes defined according to the 30% and 70% thresholds of spectrophotometry  
278 and ROC-derived threshold for Biosensor (Table 2), the Biosensor correctly identified all deficient and

279 normal males and all deficient females. In females, the Biosensor incorrectly identified 9% (2/22) of  
 280 intermediate females (activity by spectrophotometry 33% and 62%) as deficient, and 7% (9/130) of  
 281 phenotypically normal female neonates as intermediate (activity by spectrophotometer ranging from  
 282 71% to 113%). It also misdiagnosed 18% (4/22) of intermediate samples as normal. Of these 4 samples,  
 283 3 were Mahidol heterozygotes and 1 was a wild type and their enzymatic activity by  
 284 spectrophotometry ranged from 54% to 64%. Cohen's kappa coefficient was 0.841,  $p < 0.001$ . Overall,  
 285 the majority of samples with discordant results (11/15) were identified by the Biosensor as having a  
 286 "worse" phenotype. Characteristics of the 15 samples with discordant results are reported in  
 287 Supplementary Table 3.

288

289 **Table 2.** Diagnostic performance of FST and Biosensor as compared to gold standard  
 290 spectrophotometry.

291

|           |              | <i>Spectrophotometry</i> |            |           |                    |                |
|-----------|--------------|--------------------------|------------|-----------|--------------------|----------------|
|           |              | Male                     |            | Female    |                    |                |
|           |              | Deficient                | Normal     | Deficient | Intermediate       | Normal         |
| FST       | Deficient    | 20                       | 0          | 2         | 0                  | 0              |
|           | Normal       | 6*                       | 133        | 2*        | 22                 | 137            |
|           | Total        | <b>26</b>                | <b>133</b> | <b>4</b>  | <b>22</b>          | <b>137</b>     |
| Biosensor | Deficient    | 26                       | 0          | 4         | 2 <sup>#</sup>     | 0              |
|           | Intermediate | NA                       | NA         | 0         | 16                 | 9 <sup>§</sup> |
|           | Normal       | 0                        | 125        | 0         | 4 <sup>&amp;</sup> | 121            |
|           | Total        | <b>26</b>                | <b>125</b> | <b>4</b>  | <b>22</b>          | <b>130</b>     |

301 Phenotypes are based on 30% and 70% thresholds for spectrophotometry. For Biosensor, threshold  
 302 for deficiency is  $\leq 4.8$  IU/gHb and 4.9 to 9.9 IU/gHb for intermediate, both obtained by ROC analysis.  
 303 Total sample for Biosensor was 307; total sample for FST was 322 (3 samples were not analysed by  
 304 FST at the clinic)

305

306 \*Enzymatic activities ranging from 12% to 27% of spectrophotometry MM.

307 <sup>#</sup> Two Mahidol heterozygotes with activity by spectrophotometry of 33% and 62% of MM.

308 <sup>§</sup> Two Mahidol heterozygotes and 7 wild type samples with enzymatic activity by spectrophotometry  
 309 ranging from 71% to 113%.

310 <sup>&</sup> Three Mahidol heterozygotes and 1 wild type samples with enzymatic activity by  
 311 spectrophotometry ranging from 54% to 64%.

312 Characteristics of discordant samples are reported in Supplementary Table 1.

313

314

1  
2  
3 315  
4 316  
5  
6 317 No difference in results were observed by clinic (ICC=0.899,  $p<0.001$  in MKT and ICC=0.930,  $p<0.001$  in  
7  
8 318 WPA) or user. In MKT clinic where the test was used over 20 months, a trend of larger absolute mean  
9  
10 319 differences in activity (Biosensor - Spectrophotometry) were observed in the last 4-8 months of use as  
11  
12  
13 320 compared to the first 12 months (Supplementary Figure 1).

### 321 Risk of neonatal hyperbilirubinaemia

322 Risk of neonatal hyperbilirubinemia by phenotype (determined by spectrophotometry) was assessed  
323 in term neonates (EGA $\geq$ 38weeks). A significantly larger proportion of G6PD deficient neonates (29%)  
324 underwent phototherapy for treatment of NH as compared to G6PD normal (6%, RR[95%CI] =4.9 [2.3-  
325 10.5];  $P<0.001$ ). A larger proportion of female neonates with intermediate phenotypes (90% of whom  
326 were heterozygotes) required phototherapy (15%), although in this small cohort the difference did not  
327 reach statistical significance (RR[95%CI] =2.6 [0.8-8.1];  $P=0.13$ ; supplementary Table 4. Relative risk by  
328 quantitative phenotypes were similar to those already established by genotypes in the same  
329 population [5].

### 330 Biosensor training, user proficiency and usability assessment

331 A total of 22 midwives in two clinics were initially trained and completed the users' proficiency test,  
332 including 7 senior, 10 junior and 5 assistant midwives. Median (min-max) observed score from the  
333 questionnaire (max 7 points) and observed tests (max 18 points) was 22.1 (18-24.5). The median score  
334 did not differ by seniority: assistant 21.4 (18.0-23.5), junior 22.0 (19.3-24.5), senior 22.8 (21.0-24.5);  
335 most midwives (72%) had a score  $>21$  points ( $>85\%$  of maximum score). The most common mistakes  
336 in the questionnaire were on how to mix the blood and the buffer (pipetting 10 times vs shaking the  
337 buffer tube) and on volume of blood mixture to transfer into the device. On observation, the most  
338 common mistakes were failure to check the date on Biosensor screen and failure to check test expiry  
339 date (rated as minor mistakes since expired test strips are automatically recognized by the Biosensor  
340 and rejected).

341 Two focus group discussions were held in December 2021 in MKT clinic, four weeks after completion  
 342 of the sample collection at that site; one FGD included 6 senior and junior midwives, and one included  
 343 6 assistant midwives. Discussions on satisfaction, learnability, willingness, and suitability and future  
 344 use are summarized in Table 3. Overall satisfaction was high, although staff were concerned with  
 345 invalid results, and found it challenging to dedicate one member of the team to perform the biosensor  
 346 test in the delivery room in the busy postpartum period. In terms of learnability, the midwife assistants  
 347 reported learning the device more easily, though some were anxious about missing steps. The senior  
 348 staff were anxious about mistakes and clotted blood, and reported the need to refer to the instructions  
 349 as a problem. Contrary to the positive expressions to keep using the device at the clinic, the midwives'  
 350 willingness to use the device was not high and they requested a dedicated staff to perform the test or  
 351 the test to be done in the laboratory. In terms of suitability and future use, the midwives found the  
 352 results clinically useful and a valuable diagnostic tool in both their setting and field clinics. However,  
 353 they were concerned about neglecting clinical care while doing a laboratory test, the cost of the device,  
 354 and emphasized the need for good training.

355 **Table 3.** Selected quotes by theme from focus group discussions.

| Theme           | Quotes                                                                                                                                                                                                                                                                                                                                                                                                                                                                                                  |
|-----------------|---------------------------------------------------------------------------------------------------------------------------------------------------------------------------------------------------------------------------------------------------------------------------------------------------------------------------------------------------------------------------------------------------------------------------------------------------------------------------------------------------------|
| A. Satisfaction | <p>“It is very good for the children. It is good to know if the child has G6PD deficiency or not from birth. The advantage of the device is that it can detect the children without having to do a heel stick on the baby. On the other hand, there is an increase in work.... But now that we are good at using it, it’s fine.” [FGD1]</p> <p>“Sometimes if someone is doing the test by using the device it means there are fewer staffs to be with mothers and babies which is not good.” [FGD1]</p> |
| B. Learnability | <p>“After the one-time training, we had 1 or 2 times experiences practically. Then we can do it.” [FGD2]</p> <p>“I am really scared I will forget the steps.” [FGD2]</p> <p>“We have to look at the book very often, if not we forget the process of what to put and how to put it.” [FGD1]</p>                                                                                                                                                                                                         |
| C. Willingness  | <p>“Facilitator: Yes. What do you think about keeping on using this device in the future?<br/>         Participant: Of course. It is good.<br/>         Participant: Yes, it is good. But if we can have a specific staff to do it then it will be better.” [FGD2]</p> <p>“To make changes, take out the blood and send it to the lab. Then only lab staff have to</p>                                                                                                                                  |

|                             |                                                                                                                                                                                                                                                                                                                                                                                                                                                                                                  |
|-----------------------------|--------------------------------------------------------------------------------------------------------------------------------------------------------------------------------------------------------------------------------------------------------------------------------------------------------------------------------------------------------------------------------------------------------------------------------------------------------------------------------------------------|
|                             | do that.” [FGD1]                                                                                                                                                                                                                                                                                                                                                                                                                                                                                 |
| D. Suitability & Future Use | <p>“Because we can know that early, we can have counseling with the parents about the chances of their children getting yellow skin. We can take time to counsel.” [FGD1]</p> <p>“Because we can know the right result of the G6PD deficiency in a short time. Especially for the clinic which doesn’t have a lab then it is difficult to know the G6PD status. But with this device, they will only need to take a little blood from the baby and they can know the result of G6PD.” [FGD2]</p> |

356

## 357 DISCUSSION

358 This is the first study to assess clinical performance and usability by locally trained health workers of  
 359 the “STANDARD G6PD” Biosensor test for identification of G6PD deficient and intermediate  
 360 phenotypes in cord blood. Current data, together with previously collected evidence from clinical trials  
 361 in the same population [5], clearly indicate that newborn heterozygous girls with G6PD intermediate  
 362 phenotypes, who are not identified by the FST, are at increased risk of NH and require phototherapy  
 363 [7, 8]. The availability of a validated POC quantitative test such as the Biosensor and its inclusion in  
 364 diagnostics guidelines for neonatal care at birth will allow identification of this group of neonates and  
 365 better clinical care in several settings [22-25]. Together with other easy-to-use non-invasive tools for  
 366 diagnosis of NH (e.g. Transcutaneous bilirubinometers), this study provides evidence that Biosensor  
 367 could be used in non-tertiary rural settings for identification of neonates who need referral to higher  
 368 levels of care. In settings where phototherapy is available, this study indicates that the Biosensor is a  
 369 better option than FST to support clinical management of neonates. Technical performance of the  
 370 Biosensor using ROC-derived threshold was comparable to that observed in adult blood in laboratory  
 371 and field studies [26-29].

372 The phenotypic classification provided by the Biosensor was superior to the currently available  
 373 qualitative test (FST) both for deficient and for intermediate phenotypes. Among intermediate  
 374 phenotypes, 80% were identified as either deficient or intermediate, allowing a better identification  
 375 of neonates at potential jaundice risk as compared to the currently used FST-based diagnosis [14, 30].  
 376 Poor performance of FST can be explained by the higher G6PD enzymatic activity at birth as compared

1  
2  
3 377 to adulthood [31, 32]; this is probably the result of several haematological factors including younger  
4  
5 378 red cell age, increased number of reticulocytes with higher G6PD activity [33, 34] and higher WBC  
6  
7 379 count [28] as observed here. Importantly, because of higher enzymatic activity in cord blood,  
8  
9  
10 380 thresholds established in adult blood cannot be used to identify deficient or intermediate phenotypes  
11  
12 381 by either spectrophotometry or Biosensor at birth and would have missed identification of 10% (3/29)  
13  
14 382 deficient neonates (2/26 deficient males and 1/4 deficient females) and 86% (19/22) intermediate  
15  
16 383 females.

17  
18  
19 384 Biosensor haemoglobin values had a moderate correlation with those assessed by automatic  
20  
21 385 haematology analyser. Although cord (and neonatal) blood samples have higher haemoglobin levels  
22  
23 386 and increased viscosity, Biosensor's performance in measuring G6PD activity was not worse at higher  
24  
25 387 haemoglobin levels.

26  
27  
28 388 While the Biosensor provided a numeric result in 94.5% of cases, in few cases an "error" message or a  
29  
30 389 "HI" result was obtained which, according to the protocol, required re-analysis of the sample. Samples  
31  
32 390 that tested "HI" were confirmed to be normal, both phenotypically by spectrophotometry and by  
33  
34 391 genotype (all wild type). In routine practice it will not be needed to repeat the test in samples showing  
35  
36 392 "HI" result should the manufacturers include this information in the instructions for use.

37  
38  
39 393 The usability component of the study highlighted important themes to be taken into consideration for  
40  
41 394 future use of the Biosensor at birth. The midwives have been involved in previous research regarding  
42  
43 395 neonatal jaundice and appreciated the importance of early G6PD diagnosis to identify newborns most  
44  
45 396 at risk of neonatal hyperbilirubinaemia and to facilitate optimal clinical care and parental counselling.

46  
47  
48 397 The non-invasive nature of cord blood analysis was considered an advantage. In this setting, the SMRU  
49  
50 398 midwives recommended that the test be performed by dedicated staff or by the available laboratory  
51  
52 399 to assure appropriate clinical care is provided to the newborns and mothers; nevertheless, they  
53  
54 400 estimated that in more rural contexts it may be appropriate for trained birth attendants to perform  
55  
56 401 the test. Of note, midwives considered their reliance on reading the visual aid while performing the  
57  
58 402 test (which is standard practice in laboratories) a weakness and this aspect might need to be taken  
59  
60

1  
2  
3 403 into account when training clinic field staff. Usability results obtained here might not be generalizable  
4  
5 404 to every other context but there are data being collected in several rural and community-based  
6  
7 405 settings that corroborate ease of use of this device to guide malaria treatment after appropriate  
8  
9 406 training [26, 35, 36] .

10  
11 407 Although midwives felt uncertain about properly conducting the test at the beginning of the study, the  
12  
13 408 laboratory data showed highly accurate results in the first 12 months of use and very good results in  
14  
15 409 the latter 8 months, supporting suitability of the test among health care workers without prior  
16  
17 410 experience in diagnostics. Follow up studies should explore the causes of this slight decrease in quality  
18  
19 411 over time which could be attributed to environmental or users' factors as well as device durability over  
20  
21 412 >1 year of use in tropical conditions.

#### 22 413 Limitations

23  
24 414 A practical limitation of Biosensor testing on cord blood is the extra step needed to collect the blood  
25  
26 415 with a syringe from the cord. A sampling device that collects a fixed volume of blood directly from the  
27  
28 416 cord would streamline the process.

29  
30 417 It is very likely that performance and reference ranges observed here in cord blood could apply to  
31  
32 418 neonatal capillary or venous blood collected within the first 24 hours of life but this was not evaluated  
33  
34 419 during the study.

35  
36 420 The study was conducted in a period critically influenced by the COVID-19 pandemic. Travel restrictions  
37  
38 421 resulted in a delayed study start, reduced enrolment in one clinic (WPA), and a protracted enrolment  
39  
40 422 duration of the study overall. Fewer than planned FGD were conducted—including planned discussions  
41  
42 423 at key time points during the study—and they occurred in a single clinical site providing a possibly  
43  
44 424 narrower point of view on the usability topics explored. Additional staff stressors and human resource  
45  
46 425 limitations due to COVID-19 and the political unrest in Myanmar in 2021 were not assessed but may  
47  
48 426 have influenced the results of both the technical and usability components of the study.

49 427

#### 50 428 CONCLUSIONS



1  
2  
3 429 The “STANDARD G6PD” Biosensor is a reliable POC tool to support the perinatal care of newborns at  
4  
5 430 higher risk of neonatal hyperbilirubinemia by demonstrating very high sensitivity in identification of  
6  
7 431 deficient newborns and high sensitivity in identification of female newborns with intermediate activity.  
8  
9  
10 432 Its use by trained personnel in rural clinics and birthing centers with a high prevalence of G6PD  
11  
12 433 deficiency, together with assessment of bilirubin levels before discharge, has the potential to avert  
13  
14 434 disability and death from hyperbilirubinaemia.  
15  
16  
17 435 Extending use of the Biosensor for newborn testing in countries where it is already deployed for  
18  
19 436 malaria case management in resource-constrained settings [37], would provide a higher return on this  
20  
21 437 investment. Use of Biosensor in populations with prevalent G6PD deficiency outside malaria endemic  
22  
23 438 regions might increase the benefit-cost ratio of universal screening [38] in all settings [39].  
24  
25  
26

### 27 439 **Figures Legends and Captions**

28  
29  
30 440 **Figure 1.** Distribution of G6PD enzymatic activity from cord blood samples detected by gold standard  
31 441 spectrophotometry assay (A) and Biosensor (B) according to sex and genotype  
32

33 442  
34  
35 443 **Figure 2.** Bland Altman plot of G6PD activity (A) and haemoglobin levels (B) in cord blood comparing  
36 444 gold standard spectrophotometry to Biosensor  
37

38 445 *(A) Delta G6PD=G6PD Biosensor- G6PD Spectrophotometry*  
39 446 *Full horizontal line indicates mean difference (1.05IU/gHb); dotted horizontal lines indicate limits of*  
40 447 *agreement (-3.52 to 5.62IU/gHb)*  
41 448 *(B) Delta Hb=Hb Biosensor- Hb Spectrophotometry*  
42 449 *Full horizontal line indicates mean difference (0.70g/dL); dotted horizontal lines indicate limits of*  
43 450 *agreement (-2.83 to 4.23g/dL)*  
44 451

45  
46 452 **Figure 3.** Receiver Operating Characteristic curve of Biosensor for 30% activity (A) and 70% activity  
47 453 (B) thresholds.  
48

49 454

50 455

51 456

### 52 457 **ACKNOWLEDGMENTS**

53  
54  
55 458 The authors wish to thank all the mothers for their collaboration and understanding; the study would  
56  
57 459 not have been possible without the hard work and dedication of all SMRU staff involved, especially  
58  
59  
60

1  
2  
3 460 during such a difficult time of political unrest and COVID-19 pandemic. Acknowledgments are also  
4  
5 461 extended to SD Biosensor for donating the devices and the tests for the study.  
6  
7  
8

#### 9 462 ETHICAL APPROVAL

10  
11  
12 463 The study was approved by Oxford Tropical Research Ethics Committee, UK (OxTREC 532-19), the  
13  
14 464 Mahidol University Faculty of Tropical Medicine Ethics Committee, Thailand (TMEC 19-048, MUTM  
15  
16 465 2019-080-02) and the Tak Province Border Community Ethics Advisory Board (TCAB201904). Written  
17  
18 466 informed consent was obtained from literate mothers and midwives; a thumbprint was obtained in  
19  
20 467 the presence of a literate witness for illiterate mothers.  
21  
22  
23

#### 24 468 AUTHORS' CONTRIBUTION

25  
26  
27 469 Substantial contributions to the conception or design of the work: GB, AH, FN, VIC and RM.  
28  
29 470 Acquisition, analysis or interpretation of data for the work: GB, MEG, EW, GG, PP, PKM, LA, NSW, SW,  
30  
31 471 KKA, AH, BH, FN, VIC and RM. Drafting the work or revising it critically for important intellectual  
32  
33 472 content: GB, MEG, EW, GG, PP, PKM, LA, NSW, SW, KKA, AH, BH, FN, VIC and RM. Final approval of  
34  
35 473 the version to be published: all authors. Agreement to be accountable for all aspects of the work in  
36  
37 474 ensuring that questions related to the accuracy or integrity of any part of the work are appropriately  
38  
39 475 investigated and resolved: all authors.  
40  
41  
42  
43

#### 44 476 COMPETING INTERESTS

45  
46  
47 477 None declared.  
48

#### 49 478 FUNDING

50  
51  
52 479 The study was supported by a grant to GB by the Wellcome Trust Institutional Translational Partnership  
53  
54 480 Awards: Thailand Major Overseas Programme (WT-iTP-2019/004). SMRU is supported by the  
55  
56 481 Wellcome Trust [grant 220211]. For the purpose of Open Access, the authors have applied a CC BY  
57  
58 482 public copyright licence to any author accepted manuscript version arising from this submission. The  
59  
60

1  
2  
3 483 funders had no role in study design, data collection and analysis, decision to publish, or preparation of  
4  
5 484 the manuscript.  
6  
7  
8

9 485 DATA AVAILABILITY STATEMENT

10 486 De-identified participant data are available from the Mahidol Oxford Tropical Medicine Data Access  
11  
12  
13 487 Committee upon request from this link: [https://www.tropmedres.ac/units/moru-bangkok/bioethics-](https://www.tropmedres.ac/units/moru-bangkok/bioethics-engagement/datasharing)  
14  
15 488 [engagement/datasharing](https://www.tropmedres.ac/units/moru-bangkok/bioethics-engagement/datasharing).  
16  
17

18 489  
19  
20  
21

22 490 REFERENCES  
23  
24 491

- 25  
26 492 1. Bhutani VK, Zipursky A, Blencowe H, Khanna R, Sgro M, Ebbesen F, et al. Neonatal  
27 493 hyperbilirubinemia and Rhesus disease of the newborn: incidence and impairment estimates  
28 494 for 2010 at regional and global levels. *Pediatric research*. 2013;74 Suppl 1:86-100.  
29 495 2. Bhutani VK, Vilms RJ, Hamerman-Johnson L. Universal bilirubin screening for severe  
30 496 neonatal hyperbilirubinemia. *J Perinatol*. 2010;30 Suppl:S6-15.  
31 497 3. Olusanya BO, Kaplan M, Hansen TWR. Neonatal hyperbilirubinaemia: a global  
32 498 perspective. *Lancet Child Adolesc Health*. 2018;2(8):610-20.  
33 499 4. Lauer BJ, Spector ND. Hyperbilirubinemia in the newborn. *Pediatr Rev*.  
34 500 2011;32(8):341-9.  
35 501 5. Bancone G, Gornsawun G, Peerawaranun P, Penpitchaporn P, Paw MK, Poe DD, et al.  
36 502 Contribution of genetic factors to high rates of neonatal hyperbilirubinaemia on the  
37 503 Thailand-Myanmar border. *Plos Global Public Health*. 2022.  
38 504 6. Cappellini MD, Fiorelli G. Glucose-6-phosphate dehydrogenase deficiency. *Lancet*.  
39 505 2008;371(9606):64-74.  
40 506 7. Kaplan M, Hammerman C, Vreman HJ, Stevenson DK, Beutler E. Acute hemolysis and  
41 507 severe neonatal hyperbilirubinemia in glucose-6-phosphate dehydrogenase-deficient  
42 508 heterozygotes. *The Journal of pediatrics*. 2001;139(1):137-40.  
43 509 8. Meloni T, Forteleoni G, Dore A, Cutillo S. Neonatal hyperbilirubinaemia in  
44 510 heterozygous glucose-6-phosphate dehydrogenase deficient females. *British journal of*  
45 511 *haematology*. 1983;53(2):241-6.  
46 512 9. Molou E, Schulpis KH, Thodi G, Georgiou V, Dotsikas Y, Papadopoulos K, et al.  
47 513 Glucose-6-Phosphate Dehydrogenase (G6PD) deficiency in Greek newborns: the  
48 514 Mediterranean C563T mutation screening. *Scandinavian journal of clinical and laboratory*  
49 515 *investigation*. 2014;74(3):259-63.  
50 516 10. WHO Working Group. Glucose-6-phosphate dehydrogenase deficiency. *Bulletin of*  
51 517 *the World Health Organization*. 1989;67(6):601-11.  
52 518 11. Howes RE, Piel FB, Patil AP, Nyangiri OA, Gething PW, Dewi M, et al. G6PD deficiency  
53 519 prevalence and estimates of affected populations in malaria endemic countries: a  
54 520 geostatistical model-based map. *PLoS medicine*. 2012;9(11):e1001339.

- 1  
2  
3 521 12. Bancone G, Chu CS, Somsakchaicharoen R, Chowwiwat N, Parker DM,  
4 522 Charunwatthana P, et al. Characterization of G6PD Genotypes and Phenotypes on the  
5 523 Northwestern Thailand-Myanmar Border. *PloS one*. 2014;9(12):e116063.
- 6 524 13. Turner C, Carrara V, Aye Mya Thein N, Chit Mo Mo Win N, Turner P, Bancone G, et al.  
7 525 Neonatal intensive care in a Karen refugee camp: a 4 year descriptive study. *PloS one*.  
8 526 2013;8(8):e72721.
- 9 527 14. Thielemans L, Gornsawun G, Hanboonkunupakarn B, Paw MK, Porn P, Moo PK, et al.  
10 528 Diagnostic performances of the fluorescent spot test for G6PD deficiency in newborns along  
11 529 the Thailand-Myanmar border: A cohort study. *Wellcome open research*. 2018;3:1.
- 12 530 15. Health NCCfWsCs. NICE. Neonatal jaundice: clinical guideline2010.
- 13 531 16. Bancone G, Chowwiwat N, Somsakchaicharoen R, Poodpanya L, Moo PK, Gornsawun  
14 532 G, et al. Single Low Dose Primaquine (0.25mg/kg) Does Not Cause Clinically Significant  
15 533 Haemolysis in G6PD Deficient Subjects. *PloS one*. 2016;11(3):e0151898.
- 16 534 17. Asiimwe C, Kyabayinze DJ, Kyalisiima Z, Nabakooza J, Bajabaite M, Counihan H, et al.  
17 535 Early experiences on the feasibility, acceptability, and use of malaria rapid diagnostic tests at  
18 536 peripheral health centres in Uganda-insights into some barriers and facilitators. *Implement  
19 537 Sci*. 2012;7:5.
- 20 538 18. Bancone G, Gilder ME, Chowwiwat N, Gornsawun G, Win E, Cho WW, et al.  
21 539 Prevalences of inherited red blood cell disorders in pregnant women of different ethnicities  
22 540 living along the Thailand-Myanmar border. *Wellcome open research*. 2017;2:72.
- 23 541 19. Bland JM, Altman DG. Statistical methods for assessing agreement between two  
24 542 methods of clinical measurement. *Lancet*. 1986;1(8476):307-10.
- 25 543 20. Kumar R, Indrayan A. Receiver operating characteristic (ROC) curve for medical  
26 544 researchers. *Indian pediatrics*. 2011;48(4):277-87.
- 27 545 21. Thielemans L, Peerawaranun P, Mukaka M, Paw MK, Wiladphaingern J, Landier J, et  
28 546 al. High levels of pathological jaundice in the first 24 hours and neonatal hyperbilirubinaemia  
29 547 in an epidemiological cohort study on the Thailand-Myanmar border. *PloS one*.  
30 548 2021;16(10):e0258127.
- 31 549 22. Aynalem YA, Mulu GB, Akalu TY, Shiferaw WS. Prevalence of neonatal  
32 550 hyperbilirubinaemia and its association with glucose-6-phosphate dehydrogenase deficiency  
33 551 and blood-type incompatibility in sub-Saharan Africa: a systematic review and meta-analysis.  
34 552 *BMJ Paediatr Open*. 2020;4(1):e000750.
- 35 553 23. Bernardo J, Nock M. Pediatric Provider Insight Into Newborn Screening for Glucose-6-  
36 554 Phosphate Dehydrogenase Deficiency. *Clin Pediatr (Phila)*. 2015;54(6):575-8.
- 37 555 24. DeFavero JJ, Jnah AJ, Newberry D. Glucose-6-Phosphate Dehydrogenase Deficiency  
38 556 and the Benefits of Early Screening. *Neonatal Netw*. 2020;39(5):270-82.
- 39 557 25. Wong RJ, Montiel C, Kunda M, Stevenson DK, Bhutani VK. A novel point-of-care  
40 558 device for measuring glucose-6-phosphate dehydrogenase enzyme deficiency. *Semin  
41 559 Perinatol*. 2021;45(1):151356.
- 42 560 26. Alam MS, Kibria MG, Jahan N, Thriemer K, Hossain MS, Douglas NM, et al. Field  
43 561 evaluation of quantitative point of care diagnostics to measure glucose-6-phosphate  
44 562 dehydrogenase activity. *PloS one*. 2018;13(11):e0206331.
- 45 563 27. Pal S, Bansil P, Bancone G, Hrutkay S, Kahn M, Gornsawun G, et al. Evaluation of a  
46 564 Novel Quantitative Test for Glucose-6-Phosphate Dehydrogenase Deficiency: Bringing  
47 565 Quantitative Testing for Glucose-6-Phosphate Dehydrogenase Deficiency Closer to the  
48 566 Patient. *The American journal of tropical medicine and hygiene*. 2019;100(1):213-21.

- 1  
2  
3 567 28. Pal S, Myburgh J, Bansil P, Hann A, Robertson L, Gerth-Guyette E, et al. Reference and  
4 568 point-of-care testing for G6PD deficiency: Blood disorder interference, contrived specimens,  
5 569 and fingerstick equivalence and precision. *PLoS one*. 2021;16(9):e0257560.
- 7 570 29. Zobrist S, Brito M, Garbin E, Monteiro WM, Clementino Freitas S, Macedo M, et al.  
8 571 Evaluation of a point-of-care diagnostic to identify glucose-6-phosphate dehydrogenase  
9 572 deficiency in Brazil. *PLoS neglected tropical diseases*. 2021;15(8):e0009649.
- 11 573 30. Kosaryan M, Mahdavi MR, Jalali H, Roshan P. Why does the Iranian national program  
12 574 of screening newborns for G6PD enzyme deficiency miss a large number of affected infants?  
13 575 *Pediatric hematology and oncology*. 2014;31(1):95-100.
- 14 576 31. Doherty AN, Kring EA, Posey YF, Maisels MJ. Glucose-6-phosphate dehydrogenase  
15 577 activity levels in white newborn infants. *The Journal of pediatrics*. 2014;164(6):1416-20.
- 17 578 32. Kaplan M, Abramov A. Neonatal hyperbilirubinemia associated with glucose-6-  
18 579 phosphate dehydrogenase deficiency in Sephardic-Jewish neonates: incidence, severity, and  
19 580 the effect of phototherapy. *Pediatrics*. 1992;90(3):401-5.
- 21 581 33. Ellis D, Sewell CE, Skinner LG. Reticulocyte enzymes and protein synthesis. *Nature*.  
22 582 1956;177(4500):190-1.
- 23 583 34. Srivastava A, Evans KJ, Sexton AE, Schofield L, Creek DJ. Metabolomics-Based  
24 584 Elucidation of Active Metabolic Pathways in Erythrocytes and HSC-Derived Reticulocytes.  
25 585 *Journal of proteome research*. 2017;16(4):1492-505.
- 27 586 35. Engel N, Ghergu C, Matin MA, Kibria MG, Thriemer K, Price RN, et al. Implementing  
28 587 radical cure diagnostics for malaria: user perspectives on G6PD testing in Bangladesh.  
29 588 *Malaria journal*. 2021;20(1):217.
- 31 589 36. Gerth-Guyette E, Adissu W, Brito M, Garbin E, Macedo M, Sharma A, et al. Usability  
32 590 of a point-of-care diagnostic to identify glucose-6-phosphate dehydrogenase deficiency: a  
33 591 multi-country assessment of test label comprehension and results interpretation. *Malaria  
34 592 journal*. 2021;20(1):307.
- 35 593 37. Chu CS, Bancone G, Kelley M, Advani N, Domingo GJ, Cutiongo-de la Paz EM, et al.  
36 594 Optimizing G6PD testing for *Plasmodium vivax* case management: why sex, counseling, and  
37 595 community engagement matter. *Wellcome open research*. 2020;5:21.
- 39 596 38. Vidavalur R, Bhutani VK. Economic evaluation of point of care universal newborn  
40 597 screening for glucose-6-Phosphate dehydrogenase deficiency in United States. *J Matern  
41 598 Fetal Neonatal Med*. 2021:1-9.
- 43 599 39. Watchko JF, Kaplan M, Stark AR, Stevenson DK, Bhutani VK. Should we screen  
44 600 newborns for glucose-6-phosphate dehydrogenase deficiency in the United States? *J  
45 601 Perinatol*. 2013;33(7):499-504.

602

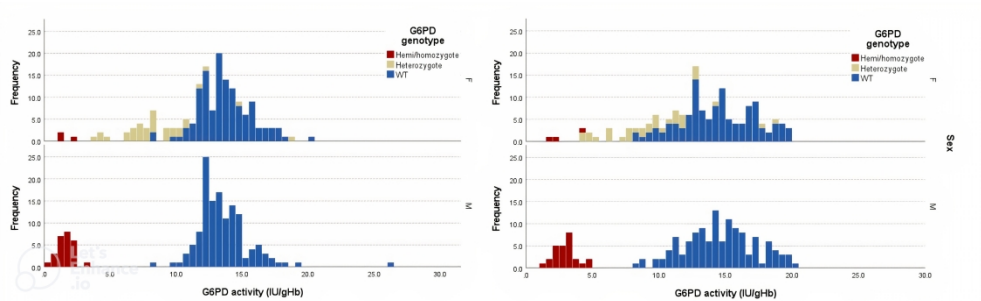

Figure 1. Distribution of G6PD enzymatic activity from cord blood samples detected by gold standard spectrophotometry assay (A) and Biosensor (B) according to sex and genotype

2217x675mm (72 x 72 DPI)

1  
2  
3  
4  
5  
6  
7  
8  
9  
10  
11  
12  
13  
14  
15  
16  
17  
18  
19  
20  
21  
22  
23  
24  
25  
26  
27  
28  
29  
30  
31  
32  
33  
34  
35  
36  
37  
38  
39  
40  
41  
42  
43  
44  
45  
46  
47  
48  
49  
50  
51  
52  
53  
54  
55  
56  
57  
58  
59  
60

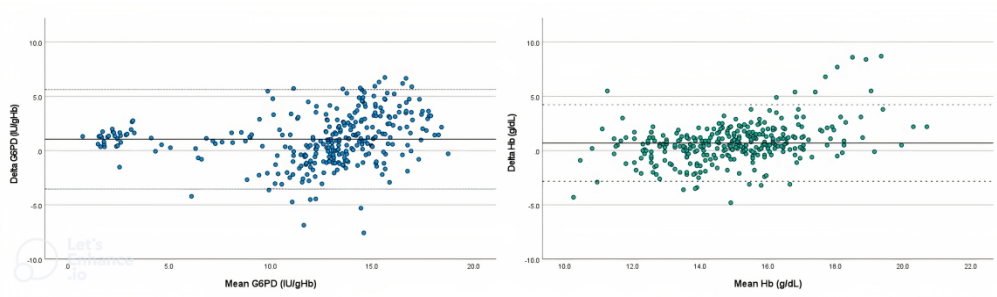

Figure 2. Bland Altman plot of G6PD activity (A) and haemoglobin levels (B) in cord blood comparing gold standard spectrophotometry to Biosensor

2142x633mm (72 x 72 DPI)

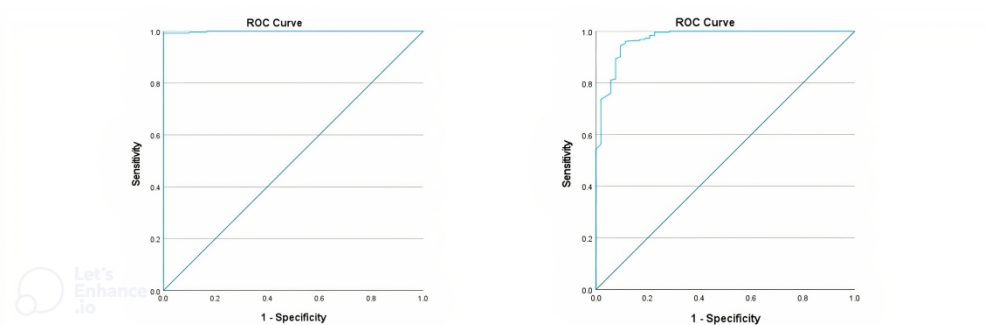

Figure 3. Receiver Operating Characteristic curve of Biosensor for 30% activity (A) and 70% activity (B) thresholds.

1972x642mm (72 x 72 DPI)



# SD G6PD BIOSENSOR (for sample)

**Prepare the machine, test device and buffer (step 1-8) BEFORE doing the blood collection (step 9)**

1  
2  
3  
4  
5  
6  
7  
8  
9  
10  
11  
12  
13  
14  
15  
16  
17  
18  
19  
20  
21  
22  
23  
24  
25  
26  
27  
28  
29  
30  
31  
32  
33  
34  
35  
36  
37  
38  
39  
40  
41  
42  
43  
44  
45  
46

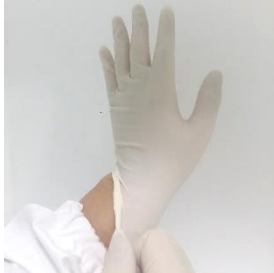

1. Put on gloves

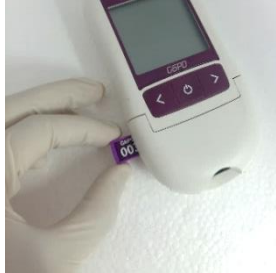

2. Insert codechip (For first time using or open new box of test device)

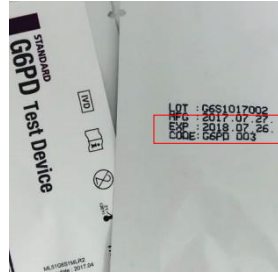

3. Check the expiry date printed on the foil pouch

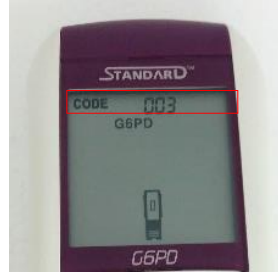

4. Check that codechip number on screen correspond to test device

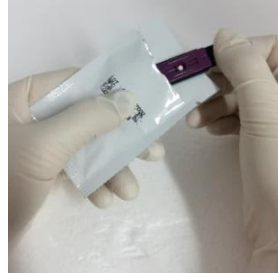

5. Open the foil pouch and take a test device out and hold the test in the right side

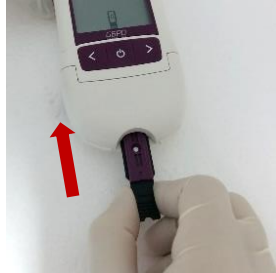

6. Insert the test device

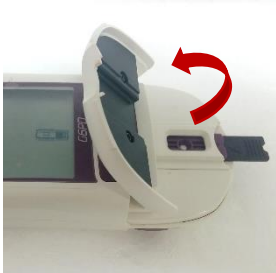

7. Open flap chamber

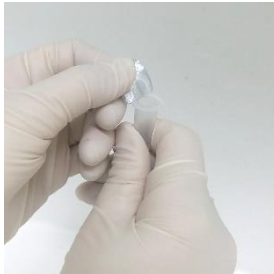

8. Open buffer tube and place on rack

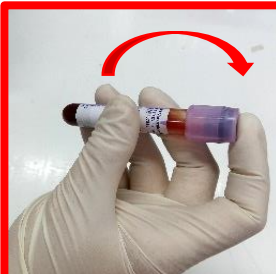

9. Mix sample tube well by inverting\* 10 times  
\*Gently, no bubbles and no shaking

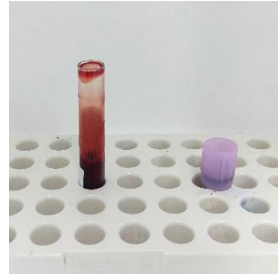

10. Place on rack

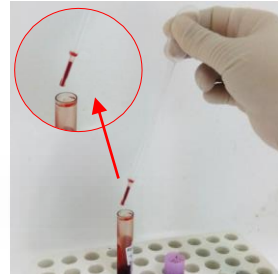

11. Collect blood by using Pasteur pipette

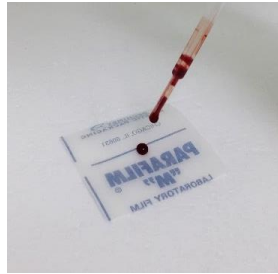

12. Drop blood on para film one drop (Avoid to make bubble)

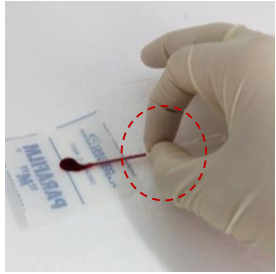

13. Hold the EZI tube horizontally, and touch the tip of the EZI tube to the blood specimen. Do not close hole.

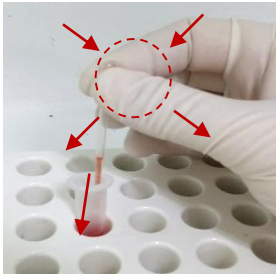

14. Mix the blood specimen with extraction buffer by pressing and releasing the EZI tube 10 times

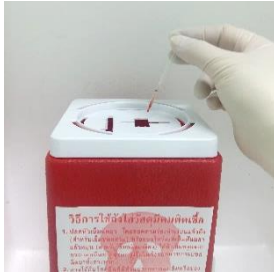

15. Discard used EZI tube in the sharp bin

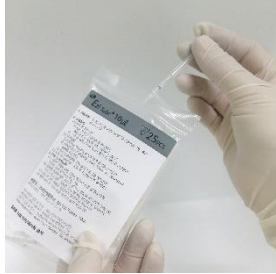

16. Take new EZI tube

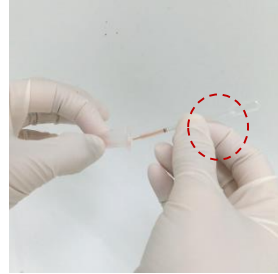

17. Hold the EZI tube horizontally, and touch the tip of the EZI tube to the mixed blood specimen. Do not close hole.

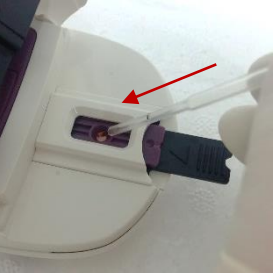

18. Apply mixed specimen to the specimen application hole of the test device

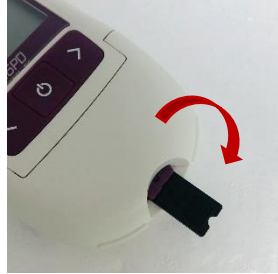

19. Close the flap chamber immediately after applying

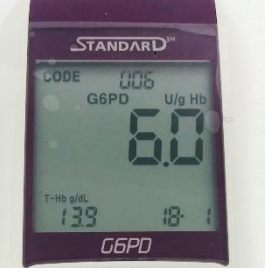

20. Wait for 2 min for the test result to appear on the screen (Check date) and report results on the logbook

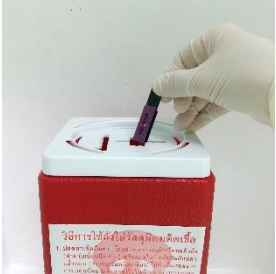

21. Take the used test device out and discard in sharp bin

**Quantitative G6PD point-of-care test can be used reliably on cord blood to identify male and female newborns at increased risk of neonatal hyperbilirubinaemia: a mixed method study**

**Supplementary Figures and Tables**

**S Table 1.** G6PD enzymatic activity (IU/gHb) of cord blood by spectrophotometry according to genotype

| G6PD genotype | N   | Mean  | Std. Deviation | Minimum | Maximum |
|---------------|-----|-------|----------------|---------|---------|
| Hemizygote    | 26  | 1.64  | 0.65           | 0.09    | 3.32    |
| Homozygote    | 3   | 1.66  | 0.43           | 1.38    | 2.16    |
| Heterozygote  | 34  | 8.55  | 2.97           | 3.54    | 18.89   |
| WT            | 262 | 13.62 | 2.02           | 8.01    | 26.32   |
| Total         | 325 | 12.02 | 4.14           | 0.09    | 26.32   |

**S Table 2.** G6PD enzymatic activity (IU/gHb) by Biosensor according to genotype

| G6PD genotype | N   | Mean  | Std. Deviation | Minimum | Maximum |
|---------------|-----|-------|----------------|---------|---------|
| Hemizygote    | 26  | 2.87  | 0.81           | 1.4     | 4.6     |
| Homozygote    | 3   | 2.70  | 1.23           | 1.8     | 4.1     |
| Heterozygote  | 34  | 9.50  | 3.47           | 4.0     | 18.6    |
| WT            | 244 | 14.46 | 2.72           | 8.1     | 20.0    |
| Total         | 307 | 12.82 | 4.47           | 1.4     | 20.0    |

**S Figure 1.** Absolute difference in G6PD activity detected by Biosensor as compared to spectrophotometry over time (only MKT clinic)

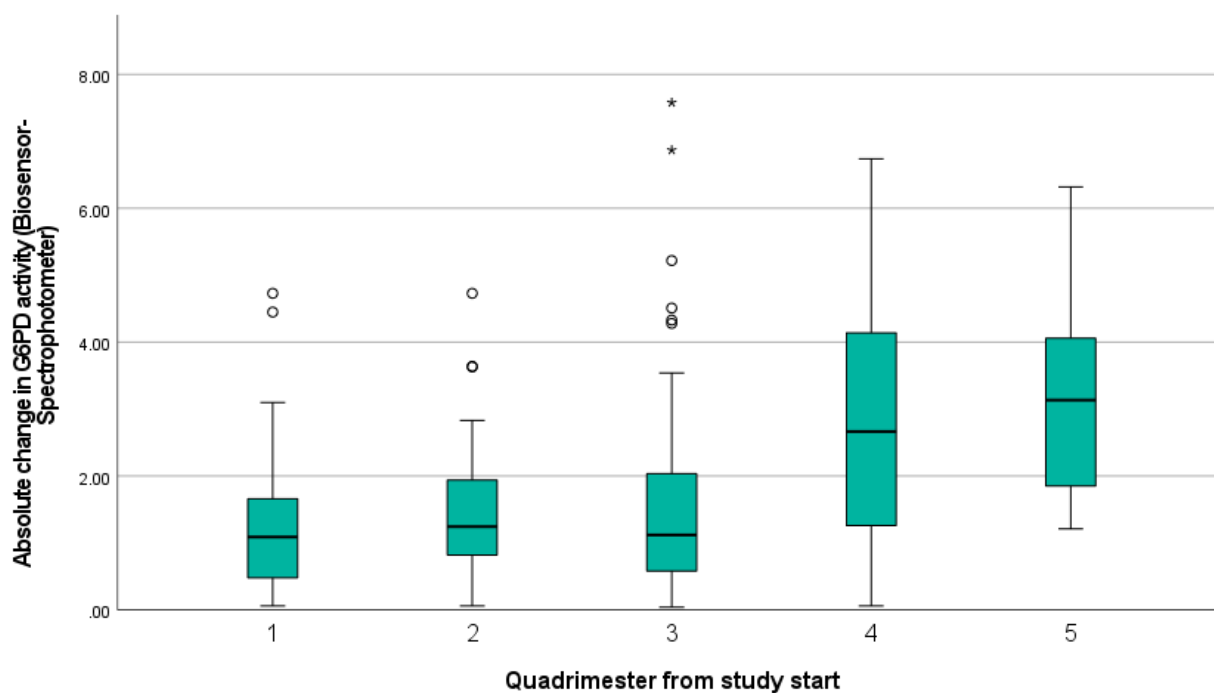

**S Table 3.** Characteristics of samples misclassified by Biosensor

| Clinic | Year | EGA | Sex | Reference G6PD (IU/gHb) | Reference Hb (g/dL) | Percent activity of reference (%) | Reference phenotype | Biosensor G6PD (IU/gHb) | Biosensor Hb (g/dL) | Percent activity of Biosensor (%) | Percent activity of reference (%) | Biosensor phenotype | G6PD genotype Mahidol | Retics (%) | WBC ( $10^3$ / uL) |
|--------|------|-----|-----|-------------------------|---------------------|-----------------------------------|---------------------|-------------------------|---------------------|-----------------------------------|-----------------------------------|---------------------|-----------------------|------------|--------------------|
| MKT    | 2020 | 42  | F   | 4.4                     | 15                  | 33                                | INT                 | 4.3                     | 15.2                | 30                                | 32                                | DEF                 | Heterozygote          | 1.5        | 13.6               |
| MKT    | 2021 | 40  | F   | 7.1                     | 15.8                | 54                                | INT                 | 12.6                    | 16.3                | 88                                | 95                                | NOR                 | Heterozygote          | 1.3        | 20.2               |
| MKT    | 2021 | 41  | F   | 7.7                     | 14.1                | 58                                | INT                 | 12.5                    | 11.5                | 87                                | 94                                | NOR                 | Heterozygote          | ND         | 20.6               |
| MKT    | 2021 | 39  | F   | 8.0                     | 15.3                | 60                                | INT                 | 10.9                    | 11.7                | 76                                | 82                                | NOR                 | WT                    | 2.3        | 19.3               |
| MKT    | 2021 | 39  | F   | 8.2                     | 14.3                | 62                                | INT                 | 4                       | 15.7                | 28                                | 30                                | DEF                 | Heterozygote          | 2.2        | 21.1               |
| MKT    | 2021 | 39  | F   | 8.5                     | 14.1                | 64                                | INT                 | 11.8                    | 14.1                | 82                                | 89                                | NOR                 | Heterozygote          | ND         | ND                 |
| WPA    | 2021 | 39  | F   | 9.4                     | 13.3                | 71                                | NOR                 | 9.8                     | 13.7                | 68                                | 74                                | INT                 | Heterozygote          | 1.6        | 13.8               |
| WPA    | 2021 | 38  | F   | 10.2                    | 14.8                | 77                                | NOR                 | 7.5                     | 15.3                | 52                                | 56                                | INT                 | Heterozygote          | 2.1        | 11.6               |
| WPA    | 2021 | 39  | F   | 10.9                    | 15.6                | 82                                | NOR                 | 8.8                     | 16.7                | 61                                | 66                                | INT                 | WT                    | 1.6        | 12.5               |
| MKT    | 2020 | 38  | F   | 11.4                    | 16.7                | 86                                | NOR                 | 9.3                     | 18.8                | 65                                | 70                                | INT                 | WT                    | 4.8        | 7.1                |
| WPA    | 2021 | 39  | F   | 11.7                    | 14.3                | 88                                | NOR                 | 8.1                     | 16.5                | 56                                | 61                                | INT                 | WT                    | 1.8        | 11.1               |
| WPA    | 2020 | 39  | F   | 11.8                    | 15.8                | 89                                | NOR                 | 9.8                     | 15.3                | 68                                | 74                                | INT                 | WT                    | 1.9        | 14.3               |
| MKT    | 2020 | 39  | F   | 12.1                    | 12.6                | 91                                | NOR                 | 9                       | 13.2                | 63                                | 68                                | INT                 | WT                    | 3.9        | 14.4               |
| MKT    | 2021 | 40  | F   | 14.2                    | 14                  | 107                               | NOR                 | 9.7                     | 16.3                | 67                                | 73                                | INT                 | WT                    | 1.7        | 11.3               |
| MKT    | 2021 | 37  | F   | 15.1                    | 11.2                | 113                               | NOR                 | 8.2                     | 12.1                | 57                                | 62                                | INT                 | WT                    | 3.7        | 15.5               |

**S Table 4.** Phototherapy treatment in newborns with EGA $\geq$ 38 weeks with different G6PD phenotypes

| G6PD phenotype by spectrophotometry | PT | No PT | % PT | RR  | 95%CI    | <i>P</i> <sub>Fisher</sub> |
|-------------------------------------|----|-------|------|-----|----------|----------------------------|
| Deficient                           | 8  | 20    | 28.6 | 4.9 | 2.3-10.5 | <0.001                     |
| Intermediate                        | 3  | 17    | 15.0 | 2.6 | 0.8-8.1  | 0.13                       |
| Normal                              | 15 | 242   | 5.8  |     |          | reference                  |
| G6PD phenotype by Biosensor         |    |       |      |     |          |                            |
| Deficient                           | 9  | 21    | 30.0 | 5.4 | 2.5-11.6 | <0.001                     |
| Intermediate                        | 2  | 20    | 9.1  | 1.7 | 0.4-6.8  | 0.49                       |
| Normal                              | 13 | 223   | 5.5  |     |          | reference                  |

| Section & Topic          | No  | Item                                                                                                                                                   | Reported on page # |
|--------------------------|-----|--------------------------------------------------------------------------------------------------------------------------------------------------------|--------------------|
| <b>TITLE OR ABSTRACT</b> |     |                                                                                                                                                        |                    |
|                          | 1   | Identification as a study of diagnostic accuracy using at least one measure of accuracy (such as sensitivity, specificity, predictive values, or AUC)  | 2                  |
| <b>ABSTRACT</b>          |     |                                                                                                                                                        |                    |
|                          | 2   | Structured summary of study design, methods, results, and conclusions (for specific guidance, see STARD for Abstracts)                                 | 2                  |
| <b>INTRODUCTION</b>      |     |                                                                                                                                                        |                    |
|                          | 3   | Scientific and clinical background, including the intended use and clinical role of the index test                                                     | 4                  |
|                          | 4   | Study objectives and hypotheses                                                                                                                        | 4                  |
| <b>METHODS</b>           |     |                                                                                                                                                        |                    |
| <i>Study design</i>      | 5   | Whether data collection was planned before the index test and reference standard were performed (prospective study) or after (retrospective study)     | 5                  |
| <i>Participants</i>      | 6   | Eligibility criteria                                                                                                                                   | 5                  |
|                          | 7   | On what basis potentially eligible participants were identified (such as symptoms, results from previous tests, inclusion in registry)                 | 5                  |
|                          | 8   | Where and when potentially eligible participants were identified (setting, location and dates)                                                         | 5                  |
|                          | 9   | Whether participants formed a consecutive, random or convenience series                                                                                | 5                  |
| <i>Test methods</i>      | 10a | Index test, in sufficient detail to allow replication                                                                                                  | 6                  |
|                          | 10b | Reference standard, in sufficient detail to allow replication                                                                                          | 6                  |
|                          | 11  | Rationale for choosing the reference standard (if alternatives exist)                                                                                  | NA                 |
|                          | 12a | Definition of and rationale for test positivity cut-offs or result categories of the index test, distinguishing pre-specified from exploratory         | 8-9                |
|                          | 12b | Definition of and rationale for test positivity cut-offs or result categories of the reference standard, distinguishing pre-specified from exploratory | 8-9                |
|                          | 13a | Whether clinical information and reference standard results were available to the performers/readers of the index test                                 | 5                  |
|                          | 13b | Whether clinical information and index test results were available to the assessors of the reference standard                                          | 5                  |
| <i>Analysis</i>          | 14  | Methods for estimating or comparing measures of diagnostic accuracy                                                                                    | 8-9                |
|                          | 15  | How indeterminate index test or reference standard results were handled                                                                                | 5                  |
|                          | 16  | How missing data on the index test and reference standard were handled                                                                                 | NA                 |
|                          | 17  | Any analyses of variability in diagnostic accuracy, distinguishing pre-specified from exploratory                                                      | NA                 |
|                          | 18  | Intended sample size and how it was determined                                                                                                         | 8                  |
| <b>RESULTS</b>           |     |                                                                                                                                                        |                    |
| <i>Participants</i>      | 19  | Flow of participants, using a diagram                                                                                                                  |                    |
|                          | 20  | Baseline demographic and clinical characteristics of participants                                                                                      | 10                 |
|                          | 21a | Distribution of severity of disease in those with the target condition                                                                                 | 11-12              |
|                          | 21b | Distribution of alternative diagnoses in those without the target condition                                                                            | NA                 |
|                          | 22  | Time interval and any clinical interventions between index test and reference standard                                                                 | NA                 |
| <i>Test results</i>      | 23  | Cross tabulation of the index test results (or their distribution) by the results of the reference standard                                            | table 2            |
|                          | 24  | Estimates of diagnostic accuracy and their precision (such as 95% confidence intervals)                                                                | 11-12              |
|                          | 25  | Any adverse events from performing the index test or the reference standard                                                                            | NA                 |
| <b>DISCUSSION</b>        |     |                                                                                                                                                        |                    |
|                          | 26  | Study limitations, including sources of potential bias, statistical uncertainty, and generalisability                                                  | 16                 |
|                          | 27  | Implications for practice, including the intended use and clinical role of the index test                                                              | 17                 |
| <b>OTHER INFORMATION</b> |     |                                                                                                                                                        |                    |
|                          | 28  | Registration number and name of registry                                                                                                               | NA                 |
|                          | 29  | Where the full study protocol can be accessed                                                                                                          | 10                 |
|                          | 30  | Sources of funding and other support; role of funders                                                                                                  | 9-10               |

For peer review only - <http://bmjopen.bmj.com/site/about/guidelines.xhtml>

# STARD 2015

---

## AIM

STARD stands for “Standards for Reporting Diagnostic accuracy studies”. This list of items was developed to contribute to the completeness and transparency of reporting of diagnostic accuracy studies. Authors can use the list to write informative study reports. Editors and peer-reviewers can use it to evaluate whether the information has been included in manuscripts submitted for publication.

---

## EXPLANATION

A **diagnostic accuracy study** evaluates the ability of one or more medical tests to correctly classify study participants as having a **target condition**. This can be a disease, a disease stage, response or benefit from therapy, or an event or condition in the future. A medical test can be an imaging procedure, a laboratory test, elements from history and physical examination, a combination of these, or any other method for collecting information about the current health status of a patient.

The test whose accuracy is evaluated is called **index test**. A study can evaluate the accuracy of one or more index tests. Evaluating the ability of a medical test to correctly classify patients is typically done by comparing the distribution of the index test results with those of the **reference standard**. The reference standard is the best available method for establishing the presence or absence of the target condition. An accuracy study can rely on one or more reference standards.

If test results are categorized as either positive or negative, the cross tabulation of the index test results against those of the reference standard can be used to estimate the **sensitivity** of the index test (the proportion of participants *with* the target condition who have a positive index test), and its **specificity** (the proportion *without* the target condition who have a negative index test). From this cross tabulation (sometimes referred to as the contingency or “2x2” table), several other accuracy statistics can be estimated, such as the positive and negative **predictive values** of the test. Confidence intervals around estimates of accuracy can then be calculated to quantify the statistical **precision** of the measurements.

If the index test results can take more than two values, categorization of test results as positive or negative requires a **test positivity cut-off**. When multiple such cut-offs can be defined, authors can report a receiver operating characteristic (ROC) curve which graphically represents the combination of sensitivity and specificity for each possible test positivity cut-off. The **area under the ROC curve** informs in a single numerical value about the overall diagnostic accuracy of the index test.

The **intended use** of a medical test can be diagnosis, screening, staging, monitoring, surveillance, prediction or prognosis. The **clinical role** of a test explains its position relative to existing tests in the clinical pathway. A replacement test, for example, replaces an existing test. A triage test is used before an existing test; an add-on test is used after an existing test.

Besides diagnostic accuracy, several other outcomes and statistics may be relevant in the evaluation of medical tests. Medical tests can also be used to classify patients for purposes other than diagnosis, such as staging or prognosis. The STARD list was not explicitly developed for these other outcomes, statistics, and study types, although most STARD items would still apply.

---

## DEVELOPMENT

This STARD list was released in 2015. The 30 items were identified by an international expert group of methodologists, researchers, and editors. The guiding principle in the development of STARD was to select items that, when reported, would help readers to judge the potential for bias in the study, to appraise the applicability of the study findings and the validity of conclusions and recommendations. The list represents an update of the first version, which was published in 2003.

More information can be found on <http://www.equator-network.org/reporting-guidelines/stard>.

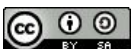

Supplement: bmjopen-2022-066529.draft_revisions.pdf [file bmjopen-2022-066529.draft_revisions.pdf]
