# Supplementary material for: Technical evaluation and usability of a quantitative G6PD POC test in cord blood: a mixed-methods study in a low-resource setting
Source: PubMed Central journal article supplement (PMC9748916; doi:10.1136/bmjopen-2022-066529), 2022-12-13
Supplement: bmjopen-2022-066529supp002.pdf [file bmjopen-2022-066529supp002.pdf]

## Quantitative G6PD point-of-care test can be used reliably on cord blood to identify male and female newborns at increased risk of neonatal hyperbilirubinaemia: a mixed method study

### Supplementary Figures and Tables

**S Table 1.** G6PD enzymatic activity (IU/gHb) of cord blood by spectrophotometry according to genotype

| G6PD genotype | N   | Mean  | Std. Deviation | Minimum | Maximum |
|---------------|-----|-------|----------------|---------|---------|
| Hemizygote    | 26  | 1.64  | 0.65           | 0.09    | 3.32    |
| Homozygote    | 3   | 1.66  | 0.43           | 1.38    | 2.16    |
| Heterozygote  | 34  | 8.55  | 2.97           | 3.54    | 18.89   |
| WT            | 262 | 13.62 | 2.02           | 8.01    | 26.32   |
| Total         | 325 | 12.02 | 4.14           | 0.09    | 26.32   |

**S Table 2.** G6PD enzymatic activity (IU/gHb) by Biosensor according to genotype

| G6PD genotype | N   | Mean  | Std. Deviation | Minimum | Maximum |
|---------------|-----|-------|----------------|---------|---------|
| Hemizygote    | 26  | 2.87  | 0.81           | 1.4     | 4.6     |
| Homozygote    | 3   | 2.70  | 1.23           | 1.8     | 4.1     |
| Heterozygote  | 34  | 9.50  | 3.47           | 4.0     | 18.6    |
| WT            | 244 | 14.46 | 2.72           | 8.1     | 20.0    |
| Total         | 307 | 12.82 | 4.47           | 1.4     | 20.0    |

**S Figure 1.** Absolute difference in G6PD activity detected by Biosensor as compared to spectrophotometry over time (only MKT clinic)

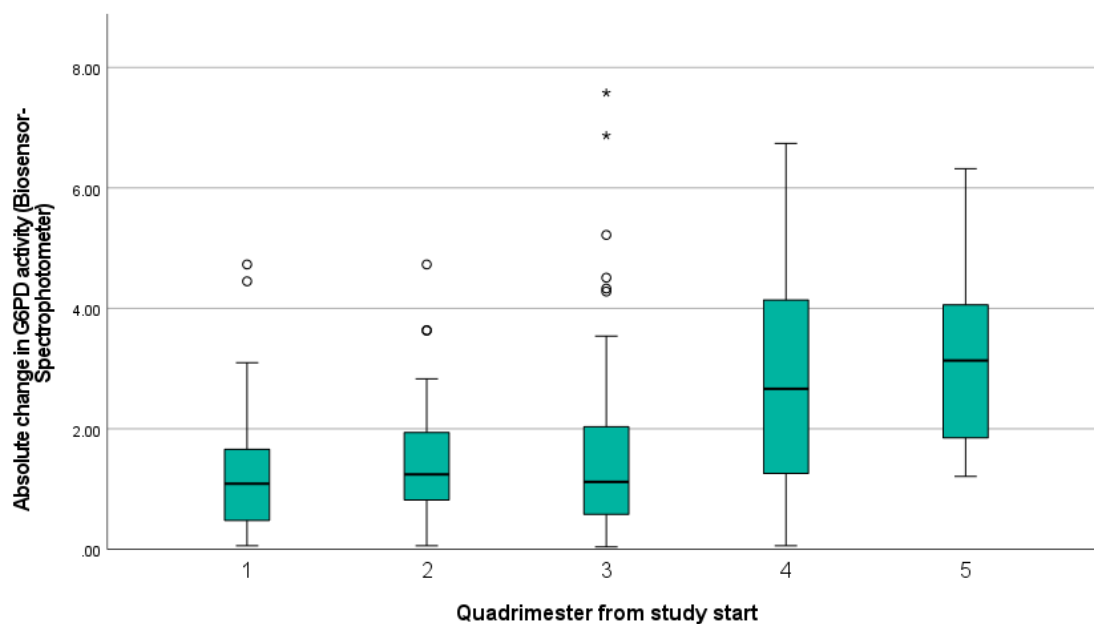

**S Table 3.** Characteristics of samples misclassified by Biosensor

| Clinic | Year | EGA | Sex | Reference G6PD (IU/gHb) | Reference Hb (g/dL) | Percent activity of reference (%) | Reference phenotype | Biosensor G6PD (IU/gHb) | Biosensor Hb (g/dL) | Percent activity of Biosensor (%) | Percent activity of reference (%) | Biosensor phenotype | G6PD genotype Mahidol | Retics (%) | WBC ( $10^3/uL$ ) |
|--------|------|-----|-----|-------------------------|---------------------|-----------------------------------|---------------------|-------------------------|---------------------|-----------------------------------|-----------------------------------|---------------------|-----------------------|------------|-------------------|
| MKT    | 2020 | 42  | F   | 4.4                     | 15                  | 33                                | INT                 | 4.3                     | 15.2                | 30                                | 32                                | DEF                 | Heterozygote          | 1.5        | 13.6              |
| MKT    | 2021 | 40  | F   | 7.1                     | 15.8                | 54                                | INT                 | 12.6                    | 16.3                | 88                                | 95                                | NOR                 | Heterozygote          | 1.3        | 20.2              |
| MKT    | 2021 | 41  | F   | 7.7                     | 14.1                | 58                                | INT                 | 12.5                    | 11.5                | 87                                | 94                                | NOR                 | Heterozygote          | ND         | 20.6              |
| MKT    | 2021 | 39  | F   | 8.0                     | 15.3                | 60                                | INT                 | 10.9                    | 11.7                | 76                                | 82                                | NOR                 | WT                    | 2.3        | 19.3              |
| MKT    | 2021 | 39  | F   | 8.2                     | 14.3                | 62                                | INT                 | 4                       | 15.7                | 28                                | 30                                | DEF                 | Heterozygote          | 2.2        | 21.1              |
| MKT    | 2021 | 39  | F   | 8.5                     | 14.1                | 64                                | INT                 | 11.8                    | 14.1                | 82                                | 89                                | NOR                 | Heterozygote          | ND         | ND                |
| WPA    | 2021 | 39  | F   | 9.4                     | 13.3                | 71                                | NOR                 | 9.8                     | 13.7                | 68                                | 74                                | INT                 | Heterozygote          | 1.6        | 13.8              |
| WPA    | 2021 | 38  | F   | 10.2                    | 14.8                | 77                                | NOR                 | 7.5                     | 15.3                | 52                                | 56                                | INT                 | Heterozygote          | 2.1        | 11.6              |
| WPA    | 2021 | 39  | F   | 10.9                    | 15.6                | 82                                | NOR                 | 8.8                     | 16.7                | 61                                | 66                                | INT                 | WT                    | 1.6        | 12.5              |
| MKT    | 2020 | 38  | F   | 11.4                    | 16.7                | 86                                | NOR                 | 9.3                     | 18.8                | 65                                | 70                                | INT                 | WT                    | 4.8        | 7.1               |
| WPA    | 2021 | 39  | F   | 11.7                    | 14.3                | 88                                | NOR                 | 8.1                     | 16.5                | 56                                | 61                                | INT                 | WT                    | 1.8        | 11.1              |
| WPA    | 2020 | 39  | F   | 11.8                    | 15.8                | 89                                | NOR                 | 9.8                     | 15.3                | 68                                | 74                                | INT                 | WT                    | 1.9        | 14.3              |
| MKT    | 2020 | 39  | F   | 12.1                    | 12.6                | 91                                | NOR                 | 9                       | 13.2                | 63                                | 68                                | INT                 | WT                    | 3.9        | 14.4              |
| MKT    | 2021 | 40  | F   | 14.2                    | 14                  | 107                               | NOR                 | 9.7                     | 16.3                | 67                                | 73                                | INT                 | WT                    | 1.7        | 11.3              |
| MKT    | 2021 | 37  | F   | 15.1                    | 11.2                | 113                               | NOR                 | 8.2                     | 12.1                | 57                                | 62                                | INT                 | WT                    | 3.7        | 15.5              |

**S Table 4.** Phototherapy treatment in newborns with EGA $\geq$ 38 weeks with different G6PD phenotypes

| G6PD phenotype by spectrophotometry | PT | No PT | % PT | RR  | 95%CI    | <i>P</i> <sub>Fisher</sub> |
|-------------------------------------|----|-------|------|-----|----------|----------------------------|
| Deficient                           | 8  | 20    | 28.6 | 4.9 | 2.3-10.5 | <0.001                     |
| Intermediate                        | 3  | 17    | 15.0 | 2.6 | 0.8-8.1  | 0.13                       |
| Normal                              | 15 | 242   | 5.8  |     |          | reference                  |
|                                     |    |       |      |     |          |                            |
| G6PD phenotype by Biosensor         |    |       |      |     |          |                            |
| Deficient                           | 9  | 21    | 30.0 | 5.4 | 2.5-11.6 | <0.001                     |
| Intermediate                        | 2  | 20    | 9.1  | 1.7 | 0.4-6.8  | 0.49                       |
| Normal                              | 13 | 223   | 5.5  |     |          | reference                  |
